# Supplementary material
Source: MDPI journal article supplement (https://www.mdpi.com/1999-4907/9/5/262)
Supplement: s1 [file s1]

## Sheet: Ark1
site	stand nr	productivity index	year scarified	point	plot	% mineral soil	% humus	% other cover	species	age (growing season)	top shoot (cm)
G	688	F11	2013	1	1	0	4	8	Scots pine	4	2.1
G	688	F11	2013	1	1	0	4	8	Scots pine	2	1.2
G	688	F11	2013	1	2	0	0	20
G	688	F11	2013	1	3	0	0	3
G	688	F11	2013	1	4	4	5	20	downy birch	3	29
G	688	F11	2013	1	4	4	5	20	downy birch	1	6
G	688	F11	2013	1	4	4	5	20	Scots pine	2	2.3
G	688	F11	2013	1	4	4	5	20	willow	1	6
G	688	F11	2013	1	5	0	0	0
G	688	F11	2013	1	6	0	0	0
G	688	F11	2013	1	7	0	2	0
G	688	F11	2013	1	8	18	8	5	Scots pine	2	2.3
G	688	F11	2013	1	8	18	8	5	Scots pine	2	0.2
G	688	F11	2013	2	1	7	17	18
G	688	F11	2013	2	2	35	45	5	downy birch	1	1.2
G	688	F11	2013	2	2	35	45	5	downy birch	1	1
G	688	F11	2013	2	2	35	45	5	downy birch	1	2
G	688	F11	2013	2	2	35	45	5	downy birch	1	0.6
G	688	F11	2013	2	2	35	45	5	downy birch	1	1
G	688	F11	2013	2	2	35	45	5	downy birch	1	0.9
G	688	F11	2013	2	2	35	45	5	downy birch	1	0.8
G	688	F11	2013	2	2	35	45	5	downy birch	1	1
G	688	F11	2013	2	2	35	45	5	Scots pine	3	15.4
G	688	F11	2013	2	2	35	45	5	Scots pine	3	8.3
G	688	F11	2013	2	2	35	45	5	Scots pine	3	6.4
G	688	F11	2013	2	2	35	45	5	Scots pine	3	3
G	688	F11	2013	2	3	0	0	2
G	688	F11	2013	2	4	0	0	50
G	688	F11	2013	2	5	9	0	4	downy birch	1	1
G	688	F11	2013	2	5	9	0	4	downy birch	1	1.5
G	688	F11	2013	2	5	9	0	4	downy birch	1	1
G	688	F11	2013	2	5	9	0	4	downy birch	1	1
G	688	F11	2013	2	5	9	0	4	downy birch	1	2
G	688	F11	2013	2	5	9	0	4	downy birch	1	3
G	688	F11	2013	2	5	9	0	4	downy birch	1	2
G	688	F11	2013	2	5	9	0	4	downy birch	1	0.5
G	688	F11	2013	2	5	9	0	4	downy birch	1	1
G	688	F11	2013	2	5	9	0	4	Scots pine	4	12.5
G	688	F11	2013	2	5	9	0	4	Scots pine	1	0.5
G	688	F11	2013	2	6	2	1	15	downy birch	2	2.5
G	688	F11	2013	2	6	2	1	15	Scots pine	2	0.2
G	688	F11	2013	2	6	2	1	15	Scots pine	2	1.4
G	688	F11	2013	2	7	18	0	7	Scots pine	2	0.1
G	688	F11	2013	2	8	3	0	0
G	688	F11	2013	3	1	2	20	8
G	688	F11	2013	3	2	0	8	11	Scots pine	3	8
G	688	F11	2013	3	3	39	55	8	downy birch	1	1
G	688	F11	2013	3	3	39	55	8	downy birch	1	0.5
G	688	F11	2013	3	3	39	55	8	downy birch	1	0.5
G	688	F11	2013	3	3	39	55	8	downy birch	1	0.8
G	688	F11	2013	3	3	39	55	8	Scots pine	3	35
G	688	F11	2013	3	3	39	55	8	Scots pine	1	1
G	688	F11	2013	3	3	39	55	8	Scots pine	1	1.1
G	688	F11	2013	3	3	39	55	8	Scots pine	1	1
G	688	F11	2013	3	3	39	55	8	Scots pine	1	1.1
G	688	F11	2013	3	4	35	40	4	downy birch	1	0.7
G	688	F11	2013	3	4	35	40	4	downy birch	1	0.6
G	688	F11	2013	3	5	0	9	0
G	688	F11	2013	3	6	0	0	15
G	688	F11	2013	3	7	65	2	0	downy birch	1	1.1
G	688	F11	2013	3	7	65	2	0	downy birch	1	1.1
G	688	F11	2013	3	7	65	2	0	downy birch	1	0.5
G	688	F11	2013	3	7	65	2	0	downy birch	1	0.4
G	688	F11	2013	3	7	65	2	0	downy birch	1	0.5
G	688	F11	2013	3	7	65	2	0	downy birch	1	0.4
G	688	F11	2013	3	7	65	2	0	downy birch	1	0.5
G	688	F11	2013	3	7	65	2	0	downy birch	1	0.6
G	688	F11	2013	3	7	65	2	0	downy birch	1	0.4
G	688	F11	2013	3	7	65	2	0	aspen	3	22
G	688	F11	2013	3	7	65	2	0	aspen	2	12
G	688	F11	2013	3	8	45	10	0	downy birch	1	0.4
G	688	F11	2013	3	8	45	10	0	downy birch	1	1.1
G	688	F11	2013	3	8	45	10	0	downy birch	1	0.5
G	688	F11	2013	3	8	45	10	0	downy birch	1	1.1
G	688	F11	2013	3	8	45	10	0	downy birch	1	1.3
G	688	F11	2013	3	8	45	10	0	downy birch	1	1.2
G	688	F11	2013	3	8	45	10	0	downy birch	1	0.4
G	688	F11	2013	3	8	45	10	0	downy birch	1	1.1
G	688	F11	2013	3	8	45	10	0	downy birch	1	0.8
G	688	F11	2013	3	8	45	10	0	downy birch	1	0.4
G	688	F11	2013	3	8	45	10	0	downy birch	1	0.8
G	688	F11	2013	3	8	45	10	0	downy birch	1	0.8
G	688	F11	2013	3	8	45	10	0	downy birch	1	0.8
G	688	F11	2013	3	8	45	10	0	Scots pine	1	1.1
G	688	F11	2013	3	8	45	10	0	Scots pine	2	2.2
G	688	F11	2013	3	8	45	10	0	aspen	1	23
G	688	F11	2013	4	1	0	0	10	silver birch	5	17
G	688	F11	2013	4	1	0	0	10	rowan	2	13
G	688	F11	2013	4	2	0	50	60	Scots pine	1	1
G	688	F11	2013	4	3	0	2	7
G	688	F11	2013	4	4	2	50	3	downy birch	1	1.8
G	688	F11	2013	4	4	2	50	3	downy birch	1	8
G	688	F11	2013	4	4	2	50	3	downy birch	1	1.2
G	688	F11	2013	4	5	1	65	1	Scots pine	2	1.1
G	688	F11	2013	4	6	70	1	8	Scots pine	2	0.5
G	688	F11	2013	4	6	70	1	8	Scots pine	1	1.2
G	688	F11	2013	4	6	70	1	8	Scots pine	2	0.2
G	688	F11	2013	4	6	70	1	8	Scots pine	1	1.6
G	688	F11	2013	4	6	70	1	8	Scots pine	2	1
G	688	F11	2013	4	7	1	0	1
G	688	F11	2013	4	8	2	0	1
G	151	F14	2012	1	1	0	0	3	downy birch	3	18
G	151	F14	2012	1	1	0	0	3	downy birch	4	23
G	151	F14	2012	1	1	0	0	3	downy birch	5	13
G	151	F14	2012	1	1	0	0	3	downy birch	3	18
G	151	F14	2012	1	1	0	0	3	downy birch	2	15
G	151	F14	2012	1	1	0	0	3	Scots pine	4	9
G	151	F14	2012	1	1	0	0	3	Scots pine	5	10
G	151	F14	2012	1	1	0	0	3	Scots pine	5	8
G	151	F14	2012	1	2	0	0	0	downy birch	4	18
G	151	F14	2012	1	2	0	0	0	Scots pine	2	5
G	151	F14	2012	1	2	0	0	0	Scots pine	3	15
G	151	F14	2012	1	2	0	0	0	Scots pine	2	4
G	151	F14	2012	1	3	30	0	1	Scots pine	4	5
G	151	F14	2012	1	3	30	0	1	Scots pine	4	7.9
G	151	F14	2012	1	3	30	0	1	Scots pine	3	9
G	151	F14	2012	1	3	30	0	1	Scots pine	3	4
G	151	F14	2012	1	4	0	0	1	Scots pine	2	7.5
G	151	F14	2012	1	4	0	0	1	Scots pine	3	7
G	151	F14	2012	1	5	0	0	4	downy birch	2	2.5
G	151	F14	2012	1	5	0	0	4	downy birch	3	13
G	151	F14	2012	1	5	0	0	4	downy birch	3	9
G	151	F14	2012	1	5	0	0	4	downy birch	2	7.5
G	151	F14	2012	1	5	0	0	4	Scots pine	3	8
G	151	F14	2012	1	5	0	0	4	Scots pine	2	3.2
G	151	F14	2012	1	5	0	0	4	Scots pine	3	9
G	151	F14	2012	1	5	0	0	4	Scots pine	2	7.5
G	151	F14	2012	1	6	2	0	1	Scots pine	2	3.5
G	151	F14	2012	1	6	2	0	1	Scots pine	2	5.5
G	151	F14	2012	1	7	0	0	18	Scots pine	4	37
G	151	F14	2012	1	7	0	0	18	Scots pine	4	24
G	151	F14	2012	1	7	0	0	18	Scots pine	2	10
G	151	F14	2012	1	8	50	0	3	downy birch	3	9
G	151	F14	2012	1	8	50	0	3	downy birch	3	15
G	151	F14	2012	1	8	50	0	3	downy birch	4	25
G	151	F14	2012	1	8	50	0	3	Scots pine	3	2.8
G	151	F14	2012	1	8	50	0	3	Scots pine	3	2
G	151	F14	2012	1	8	50	0	3	Scots pine	2	3.8
G	151	F14	2012	1	8	50	0	3	Scots pine	4	8
G	151	F14	2012	1	8	50	0	3	Scots pine	2	2.1
G	151	F14	2012	2	1	7	0	1
G	151	F14	2012	2	2	10	2	2
G	151	F14	2012	2	3	12	25	5
G	151	F14	2012	2	4	8	11	3
G	151	F14	2012	2	5	0	0	1
G	151	F14	2012	2	6	0	1	2	Scots pine	6	6.7
G	151	F14	2012	2	7	0	0	0
G	151	F14	2012	2	8	5	3	0	downy birch	4	35
G	151	F14	2012	2	8	5	3	0	Scots pine	2	2
G	151	F14	2012	2	8	5	3	0	Scots pine	1	2.2
G	151	F14	2012	3	1	0	0	0
G	151	F14	2012	3	2	2	0	11
G	151	F14	2012	3	3	3	45	9
G	151	F14	2012	3	4	4	0	2
G	151	F14	2012	3	5	0	0	2
G	151	F14	2012	3	6	3	2	4
G	151	F14	2012	3	7	0	30	15
G	151	F14	2012	3	8	0	8	25
G	151	F14	2012	4	1	2	0	6	Scots pine	4	2.1
G	151	F14	2012	4	1	2	0	6	Scots pine	2	5.6
G	151	F14	2012	4	2	20	7	5	silver birch	6	36
G	151	F14	2012	4	2	20	7	5	downy birch	3	33
G	151	F14	2012	4	2	20	7	5	downy birch	3	29
G	151	F14	2012	4	2	20	7	5	downy birch	2	5.4
G	151	F14	2012	4	2	20	7	5	Scots pine	2	2.1
G	151	F14	2012	4	2	20	7	5	Scots pine	2	1.6
G	151	F14	2012	4	3	0	2	80	downy birch	1	1.3
G	151	F14	2012	4	4	0	1	1
G	151	F14	2012	4	5	7	6	12	downy birch	2	21
G	151	F14	2012	4	6	4	0	13	downy birch	2	9
G	151	F14	2012	4	6	4	0	13	Scots pine	2	2.1
G	151	F14	2012	4	6	4	0	13	Scots pine	2	3.3
G	151	F14	2012	4	7	0	0	35
G	151	F14	2012	4	8	1	0	20
G	151	F14	2012	5	1	0	0	1
G	151	F14	2012	5	2	0	0	13
G	151	F14	2012	5	3	0	0	9	silver birch	3	21
G	151	F14	2012	5	3	0	0	9	silver birch	4	35
G	151	F14	2012	5	4	0	0	35
G	151	F14	2012	5	5	0	0	2
G	151	F14	2012	5	6	0	0	0
G	151	F14	2012	5	7	0	0	1
G	151	F14	2012	5	8	0	0	0
G	151	F14	2012	6	1	1	8	5
G	151	F14	2012	6	2	25	35	2	downy birch	3	13
G	151	F14	2012	6	2	25	35	2	downy birch	1	10
G	151	F14	2012	6	2	25	35	2	downy birch	1	9.7
G	151	F14	2012	6	2	25	35	2	downy birch	1	3.6
G	151	F14	2012	6	2	25	35	2	downy birch	1	3
G	151	F14	2012	6	2	25	35	2	downy birch	2	2.8
G	151	F14	2012	6	2	25	35	2	downy birch	1	4
G	151	F14	2012	6	2	25	35	2	downy birch	2	2.2
G	151	F14	2012	6	2	25	35	2	downy birch	1	3.9
G	151	F14	2012	6	2	25	35	2	downy birch	2	6
G	151	F14	2012	6	2	25	35	2	downy birch	2	5.8
G	151	F14	2012	6	2	25	35	2	downy birch	2	5.8
G	151	F14	2012	6	2	25	35	2	downy birch	2	5.8
G	151	F14	2012	6	2	25	35	2	downy birch	2	5.8
G	151	F14	2012	6	2	25	35	2	downy birch	2	5.8
G	151	F14	2012	6	2	25	35	2	downy birch	2	5.8
G	151	F14	2012	6	2	25	35	2	downy birch	2	5.8
G	151	F14	2012	6	2	25	35	2	downy birch	2	5.8
G	151	F14	2012	6	2	25	35	2	downy birch	2	5.8
G	151	F14	2012	6	2	25	35	2	downy birch	2	5.8
G	151	F14	2012	6	2	25	35	2	downy birch	2	5.8
G	151	F14	2012	6	2	25	35	2	downy birch	2	5.8
G	151	F14	2012	6	2	25	35	2	downy birch	2	5.8
G	151	F14	2012	6	2	25	35	2	downy birch	2	5.8
G	151	F14	2012	6	2	25	35	2	Scots pine	3	4
G	151	F14	2012	6	2	25	35	2	Scots pine	3	0.2
G	151	F14	2012	6	2	25	35	2	Scots pine	2	0.9
G	151	F14	2012	6	2	25	35	2	Scots pine	2	1.8
G	151	F14	2012	6	2	25	35	2	Scots pine	2	1
G	151	F14	2012	6	3	0	1	0
G	151	F14	2012	6	4	0	1	0
G	151	F14	2012	6	5	25	18	5	downy birch	2	14.8
G	151	F14	2012	6	6	0	2	0	Scots pine	3	2.6
G	151	F14	2012	6	7	0	8	5	downy birch	3	18.4
G	151	F14	2012	6	7	0	8	5	downy birch	3	19.5
G	151	F14	2012	6	7	0	8	5	downy birch	2	6.6
G	151	F14	2012	6	7	0	8	5	downy birch	3	19
G	151	F14	2012	6	7	0	8	5	downy birch	2	7.5
G	151	F14	2012	6	8	15	1	3	downy birch	4	16.5
G	151	F14	2012	6	8	15	1	3	downy birch	3	13
G	151	F14	2012	6	8	15	1	3	downy birch	3	11
G	151	F14	2012	6	8	15	1	3	downy birch	2	14.5
G	151	F14	2012	6	8	15	1	3	downy birch	2	14.5
G	151	F14	2012	6	8	15	1	3	downy birch	3	5.5
G	151	F14	2012	6	8	15	1	3	downy birch	1	4.5
G	151	F14	2012	6	8	15	1	3	downy birch	1	3.8
G	151	F14	2012	6	8	15	1	3	downy birch	1	3.5
G	151	F14	2012	6	8	15	1	3	downy birch	2	19.5
G	151	F14	2012	6	8	15	1	3	downy birch	2	5.8
G	151	F14	2012	6	8	15	1	3	downy birch	2	5.8
G	151	F14	2012	6	8	15	1	3	downy birch	2	5.8
G	151	F14	2012	6	8	15	1	3	downy birch	2	5.8
G	151	F14	2012	6	8	15	1	3	downy birch	2	5.8
G	151	F14	2012	6	8	15	1	3	Scots pine	4	10
G	151	F14	2012	6	8	15	1	3	Scots pine	2	3.1
G	151	F14	2012	6	8	15	1	3	Scots pine	3	6.4
G	151	F14	2012	7	1	4	7	3
G	151	F14	2012	7	2	0	0	2
G	151	F14	2012	7	3	22	2	3	downy birch	3	11.5
G	151	F14	2012	7	3	22	2	3	downy birch	3	9
G	151	F14	2012	7	3	22	2	3	downy birch	2	1.9
G	151	F14	2012	7	3	22	2	3	downy birch	3	18
G	151	F14	2012	7	3	22	2	3	downy birch	2	5.5
G	151	F14	2012	7	3	22	2	3	downy birch	1	1.3
G	151	F14	2012	7	3	22	2	3	Scots pine	2	1.2
G	151	F14	2012	7	4	10	6	8	downy birch	3	8.6
G	151	F14	2012	7	4	10	6	8	downy birch	1	2.4
G	151	F14	2012	7	4	10	6	8	downy birch	3	1.1
G	151	F14	2012	7	5	0	0	0	downy birch	5	21
G	151	F14	2012	7	5	0	0	0	downy birch	3	8
G	151	F14	2012	7	5	0	0	0	Scots pine	6	21
G	151	F14	2012	7	5	0	0	0	Scots pine	6	21
G	151	F14	2012	7	5	0	0	0	Scots pine	7	22
G	151	F14	2012	7	5	0	0	0	Scots pine	6	22
G	151	F14	2012	7	6	0	0	1
G	151	F14	2012	7	7	5	0	7	downy birch	3	5.5
G	151	F14	2012	7	7	5	0	7	downy birch	2	3.8
G	151	F14	2012	7	7	5	0	7	downy birch	3	1.5
G	151	F14	2012	7	7	5	0	7	downy birch	3	1.5
G	151	F14	2012	7	8	0	7	7	downy birch	3	5.5
G	151	F14	2012	8	1	0	0	30	downy birch	3	17
G	151	F14	2012	8	1	0	0	30	downy birch	3	18
G	151	F14	2012	8	1	0	0	30	downy birch	3	25
G	151	F14	2012	8	1	0	0	30	downy birch	2	21
G	151	F14	2012	8	1	0	0	30	downy birch	1	5.2
G	151	F14	2012	8	1	0	0	30	Scots pine	3	24
G	151	F14	2012	8	1	0	0	30	Scots pine	2	11
G	151	F14	2012	8	2	2	0	2	Scots pine	5	33.5
G	151	F14	2012	8	3	0	0	0	downy birch	5	13
G	151	F14	2012	8	4	0	0	0	downy birch	5	39
G	151	F14	2012	8	4	0	0	0	Scots pine	5	14
G	151	F14	2012	8	5	1	0	10	downy birch	2	6.5
G	151	F14	2012	8	5	1	0	10	downy birch	2	2.5
G	151	F14	2012	8	5	1	0	10	downy birch	2	4
G	151	F14	2012	8	5	1	0	10	downy birch	2	3.4
G	151	F14	2012	8	5	1	0	10	downy birch	3	9
G	151	F14	2012	8	5	1	0	10	downy birch	2	3
G	151	F14	2012	8	5	1	0	10	downy birch	2	5
G	151	F14	2012	8	6	0	0	30	downy birch	3	33
G	151	F14	2012	8	7	1	10	3	Scots pine	3	8
G	151	F14	2012	8	8	5	5	3	downy birch	3	15.5
G	151	F14	2012	8	8	5	5	3	downy birch	3	7.8
G	151	F14	2012	8	8	5	5	3	downy birch	2	5
G	151	F14	2012	8	8	5	5	3	downy birch	3	4
G	151	F14	2012	8	8	5	5	3	downy birch	2	2
G	151	F14	2012	8	8	5	5	3	downy birch	2	3
G	151	F14	2012	8	8	5	5	3	downy birch	5	17
G	151	F14	2012	8	8	5	5	3	Scots pine	3	5.2
G	151	F14	2012	9	1	0	0	5
G	151	F14	2012	9	2	0	0	2
G	151	F14	2012	9	3	0	0	15
G	151	F14	2012	9	4	0	0	1
G	151	F14	2012	9	5	20	0	4	downy birch	3	12
G	151	F14	2012	9	5	20	0	4	downy birch	4	19
G	151	F14	2012	9	6	15	0	7	Scots pine	1	1.3
G	151	F14	2012	9	6	15	0	7	Scots pine	2	0.7
G	151	F14	2012	9	7	0	2	10	Scots pine	1	1.6
G	151	F14	2012	9	7	0	2	10	Scots pine	8
G	151	F14	2012	9	8	1	3	1
G	151	F14	2012	10	1	2	4	7	Scots pine	1	1.7
G	151	F14	2012	10	2	2	1	8	Scots pine	3	2.4
G	151	F14	2012	10	2	2	1	8	Scots pine	1	1.4
G	151	F14	2012	10	3	35	22	20	Scots pine	1	1.8
G	151	F14	2012	10	4	5	9	1	Scots pine	2	2.4
G	151	F14	2012	10	5	10	2	20
G	151	F14	2012	10	6	0	4	4
G	151	F14	2012	10	7	1	6	4
G	151	F14	2012	10	8	0	0	3
G	688	F11	2013	5	1	0	10	4
G	688	F11	2013	5	2	80	17	0	Scots pine	2	1.8
G	688	F11	2013	5	2	80	17	0	Scots pine	1	0.4
G	688	F11	2013	5	3	23	2	10	Scots pine	1	2.9
G	688	F11	2013	5	3	23	2	10	Scots pine	3	4.8
G	688	F11	2013	5	3	23	2	10	Scots pine	1	4.5
G	688	F11	2013	5	4	2	20	15	Scots pine	1	1.5
G	688	F11	2013	5	5	4	2	0	downy birch	1	0.9
G	688	F11	2013	5	5	4	2	0	downy birch	1	1.2
G	688	F11	2013	5	5	4	2	0	downy birch	1	0.5
G	688	F11	2013	5	6	35	7	1	downy birch	1	1.4
G	688	F11	2013	5	6	35	7	1	downy birch	1	0.9
G	688	F11	2013	5	6	35	7	1	downy birch	1	0.7
G	688	F11	2013	5	6	35	7	1	downy birch	1	0.8
G	688	F11	2013	5	6	35	7	1	Scots pine	1	12
G	688	F11	2013	5	6	35	7	1	Scots pine	1	1.5
G	688	F11	2013	5	6	35	7	1	Scots pine	1	3
G	688	F11	2013	5	7	6	7	21	downy birch	1	1.1
G	688	F11	2013	5	8	0	3	2
G	688	F11	2013	6	1	2	20	1	Scots pine	1	0.9
G	688	F11	2013	6	1	2	20	1	Scots pine	2	1.1
G	688	F11	2013	6	2	3	60	2	Scots pine	2	1
G	688	F11	2013	6	3	0	0	10
G	688	F11	2013	6	4	0	0	5
G	688	F11	2013	6	5	2	65	0	Scots pine	3	1.4
G	688	F11	2013	6	6	0	4	0
G	688	F11	2013	6	7	6	3	11	Scots pine	1	1.7
G	688	F11	2013	6	8	1	9	23
G	688	F11	2013	7	1	15	15	1	downy birch	1	0.6
G	688	F11	2013	7	1	15	15	1	downy birch	1	0.4
G	688	F11	2013	7	1	15	15	1	downy birch	1	0.5
G	688	F11	2013	7	1	15	15	1	Scots pine	7	20
G	688	F11	2013	7	2	21	20	25	downy birch	1	0.4
G	688	F11	2013	7	2	21	20	25	downy birch	1	0.4
G	688	F11	2013	7	2	21	20	25	downy birch	1	0.4
G	688	F11	2013	7	2	21	20	25	Scots pine	2	1.9
G	688	F11	2013	7	3	25	30	3
G	688	F11	2013	7	4	4	0	2
G	688	F11	2013	7	5	3	15	3
G	688	F11	2013	7	6	40	40	7	downy birch	1	0.2
G	688	F11	2013	7	6	40	40	7	Scots pine	1	0.6
G	688	F11	2013	7	6	40	40	7	Scots pine	1	0.9
G	688	F11	2013	7	7	1	1	15	Scots pine	2	0.6
G	688	F11	2013	7	8	70	1	13
G	688	F11	2013	8	1	5	0	4
G	688	F11	2013	8	2	90	0	2	Scots pine	1	1.9
G	688	F11	2013	8	2	90	0	2	Scots pine	1	1.3
G	688	F11	2013	8	2	90	0	2	Scots pine	2	0.1
G	688	F11	2013	8	3	35	0	3	downy birch	1	0.2
G	688	F11	2013	8	3	35	0	3	downy birch	1	0.2
G	688	F11	2013	8	3	35	0	3	downy birch	1	0.2
G	688	F11	2013	8	4	80	0	5	downy birch	1	1
G	688	F11	2013	8	4	80	0	5	downy birch	1	0.6
G	688	F11	2013	8	4	80	0	5	downy birch	1	0.4
G	688	F11	2013	8	4	80	0	5	downy birch	1	0.5
G	688	F11	2013	8	4	80	0	5	downy birch	1	0.4
G	688	F11	2013	8	4	80	0	5	downy birch	1	1.1
G	688	F11	2013	8	4	80	0	5	Scots pine	2	0.1
G	688	F11	2013	8	5	5	20	3	Scots pine	2	1.4
G	688	F11	2013	8	5	5	20	3	Scots pine	2	1.5
G	688	F11	2013	8	6	0	1	50
G	688	F11	2013	8	7	2	30	0	downy birch	1	0.8
G	688	F11	2013	8	7	2	30	0	downy birch	1	1
G	688	F11	2013	8	7	2	30	0	downy birch	1	1.2
G	688	F11	2013	8	8	5	11	1	downy birch	1	0.6
G	688	F11	2013	8	8	5	11	1	downy birch	1	0.5
G	688	F11	2013	8	8	5	11	1	downy birch	1	0.6
G	688	F11	2013	8	8	5	11	1	downy birch	1	0.4
G	688	F11	2013	8	8	5	11	1	downy birch	1	0.4
G	688	F11	2013	8	8	5	11	1	downy birch	1	1.5
G	688	F11	2013	8	8	5	11	1	Scots pine	2	1
G	688	F11	2013	9	1	55	5	15	downy birch	1	1
G	688	F11	2013	9	1	55	5	15	downy birch	1	0.6
G	688	F11	2013	9	2	9	25	4
G	688	F11	2013	9	3	25	3	15	Scots pine	2	1
G	688	F11	2013	9	3	25	3	15	Scots pine	1	1
G	688	F11	2013	9	4	3	1	15
G	688	F11	2013	9	5	7	8	6	downy birch	1	0.9
G	688	F11	2013	9	5	7	8	6	downy birch	1	0.5
G	688	F11	2013	9	5	7	8	6	downy birch	1	0.5
G	688	F11	2013	9	5	7	8	6	downy birch	1	0.6
G	688	F11	2013	9	5	7	8	6	downy birch	1	0.8
G	688	F11	2013	9	5	7	8	6	downy birch	1	0.3
G	688	F11	2013	9	5	7	8	6	downy birch	1	1
G	688	F11	2013	9	5	7	8	6	downy birch	1	1.2
G	688	F11	2013	9	5	7	8	6	downy birch	1	1.5
G	688	F11	2013	9	5	7	8	6	downy birch	1	1.1
G	688	F11	2013	9	5	7	8	6	downy birch	1	0.8
G	688	F11	2013	9	5	7	8	6	downy birch	1	0.8
G	688	F11	2013	9	5	7	8	6	downy birch	1	0.8
G	688	F11	2013	9	6	1	1	6	Scots pine	1	2.2
G	688	F11	2013	9	7	0	2	2	Scots pine	1	2.2
G	688	F11	2013	9	8	0	2	0	Scots pine	1	2.2
G	688	F11	2013	10	1	8	0	0	downy birch	1	3
G	688	F11	2013	10	1	8	0	0	downy birch	1	1.4
G	688	F11	2013	10	1	8	0	0	downy birch	1	0.3
G	688	F11	2013	10	1	8	0	0	downy birch	1	0.5
G	688	F11	2013	10	1	8	0	0	downy birch	1	1.4
G	688	F11	2013	10	1	8	0	0	downy birch	1	0.4
G	688	F11	2013	10	1	8	0	0	downy birch	1	0.5
G	688	F11	2013	10	1	8	0	0	downy birch	1	1.1
G	688	F11	2013	10	1	8	0	0	downy birch	1	0.4
G	688	F11	2013	10	1	8	0	0	downy birch	1	1.5
G	688	F11	2013	10	1	8	0	0	downy birch	1	1.1
G	688	F11	2013	10	1	8	0	0	downy birch	1	1.1
G	688	F11	2013	10	1	8	0	0	downy birch	1	1.1
G	688	F11	2013	10	1	8	0	0	downy birch	1	1.1
G	688	F11	2013	10	1	8	0	0	downy birch	1	1.1
G	688	F11	2013	10	1	8	0	0	downy birch	1	1.1
G	688	F11	2013	10	2	0	0	0
G	688	F11	2013	10	3	0	0	1
G	688	F11	2013	10	4	24	0	0	Scots pine	1	1.4
G	688	F11	2013	10	5	20	20	5	downy birch	1	1
G	688	F11	2013	10	5	20	20	5	Scots pine	1	1.2
G	688	F11	2013	10	6	0	0	0	Scots pine	2	2.9
G	688	F11	2013	10	6	0	0	0	Scots pine	2	1.7
G	688	F11	2013	10	6	0	0	0	Scots pine	2	0.4
G	688	F11	2013	10	7	0	0	15
G	688	F11	2013	10	8	0	0	3	downy birch	2	5.6
G	688	F11	2013	10	8	0	0	3	Scots pine	3	3.4
G	158	F11	2012	1	1	0	2	8
G	158	F11	2012	1	2	11	3	2
G	158	F11	2012	1	3	0	0	10
G	158	F11	2012	1	4	2	1	2
G	158	F11	2012	1	5	0	0	0
G	158	F11	2012	1	6	0	55	4
G	158	F11	2012	1	7	0	20	6
G	158	F11	2012	1	8	12	15	3
G	158	F11	2012	2	1	0	15	2
G	158	F11	2012	2	2	0	23	0
G	158	F11	2012	2	3	6	1	4
G	158	F11	2012	2	4	0	2	3
G	158	F11	2012	2	5	0	1	3
G	158	F11	2012	2	6	0	67	1
G	158	F11	2012	2	7	0	0	0	Norway spruce	3	2.1
G	158	F11	2012	2	7	0	0	0	Scots pine	3	12.2
G	158	F11	2012	2	8	1	8	2	Norway spruce	3	1.2
G	158	F11	2012	2	8	1	8	2	Norway spruce	3	3.1
G	158	F11	2012	2	8	1	8	2	Scots pine	5	8.9
G	158	F11	2012	2	8	1	8	2	Scots pine	5	8.4
G	158	F11	2012	3	1	30	7	2	downy birch	1	0.8
G	158	F11	2012	3	1	30	7	2	Scots pine	1	2
G	158	F11	2012	3	2	1	0	1
G	158	F11	2012	3	3	0	2	9
G	158	F11	2012	3	4	3	0	6
G	158	F11	2012	3	5	0	0	15
G	158	F11	2012	3	6	0	0	1
G	158	F11	2012	3	7	0	45	3
G	158	F11	2012	3	8	0	2	4	Norway spruce	2	4.4
G	158	F11	2012	3	8	0	2	4	Scots pine	4	17.5
G	158	F11	2012	4	1	0	13	10
G	158	F11	2012	4	2	0	45	11
G	158	F11	2012	4	3	20	20	5
G	158	F11	2012	4	4	50	2	4	silver birch	3	33.5
G	158	F11	2012	4	5	60	2	10
G	158	F11	2012	4	6	0	0	1
G	158	F11	2012	4	7	0	0	1
G	158	F11	2012	4	8	0	0	1
G	158	F11	2012	5	1	18	73	2	downy birch	3	30
G	158	F11	2012	5	1	18	73	2	downy birch	2	2.5
G	158	F11	2012	5	1	18	73	2	downy birch	2	5.5
G	158	F11	2012	5	1	18	73	2	downy birch	1	5
G	158	F11	2012	5	2	0	26	0	Scots pine	5	18.9
G	158	F11	2012	5	3	0	12	3
G	158	F11	2012	5	4	0	1	3
G	158	F11	2012	5	5	4	3	1
G	158	F11	2012	5	6	1	2	1	downy birch	2	11.8
G	158	F11	2012	5	7	0	40	5	downy birch	3	16.4
G	158	F11	2012	5	8	0	20	4
G	158	F11	2012	6	1	0	23	0	Norway spruce	20	13.5
G	158	F11	2012	6	2	3	8	2
G	158	F11	2012	6	3	20	0	20	downy birch	4	35
G	158	F11	2012	6	3	20	0	20	downy birch	2	15.6
G	158	F11	2012	6	3	20	0	20	downy birch	2	5.8
G	158	F11	2012	6	3	20	0	20	downy birch	3	20.2
G	158	F11	2012	6	3	20	0	20	Norway spruce	14	6.1
G	158	F11	2012	6	4	15	2	15	downy birch	1	4.7
G	158	F11	2012	6	4	15	2	15	Norway spruce	6	11.4
G	158	F11	2012	6	5	3	0	1	downy birch	3	12.6
G	158	F11	2012	6	6	18	0	1
G	158	F11	2012	6	7	4	35	3	downy birch	1	2.3
G	158	F11	2012	6	7	4	35	3	downy birch	1	1.5
G	158	F11	2012	6	7	4	35	3	downy birch	1	1.4
G	158	F11	2012	6	7	4	35	3	Scots pine	1	1.8
G	158	F11	2012	6	8	0	2	4	downy birch	2	17.8
G	158	F11	2012	7	1	0	28	0	downy birch	2	6.1
G	158	F11	2012	7	1	0	28	0	Scots pine	2	1
G	158	F11	2012	7	2	0	1	0
G	158	F11	2012	7	3	6	20	7	downy birch	3	21.5
G	158	F11	2012	7	4	22	0	3	downy birch	3	8.4
G	158	F11	2012	7	4	22	0	3	downy birch	2	5.3
G	158	F11	2012	7	4	22	0	3	downy birch	3	14.8
G	158	F11	2012	7	4	22	0	3	downy birch	2	8.1
G	158	F11	2012	7	4	22	0	3	downy birch	3	20.2
G	158	F11	2012	7	4	22	0	3	Scots pine	3	5.2
G	158	F11	2012	7	4	22	0	3	Scots pine	2	14
G	158	F11	2012	7	5	0	0	5	downy birch	3	34.7
G	158	F11	2012	7	5	0	0	5	downy birch	2	8.5
G	158	F11	2012	7	5	0	0	5	downy birch	2	10
G	158	F11	2012	7	5	0	0	5	Scots pine	2	4.4
G	158	F11	2012	7	6	20	3	15	silver birch	2	12.5
G	158	F11	2012	7	6	20	3	15	silver birch	2	6.8
G	158	F11	2012	7	6	20	3	15	silver birch	2	5.1
G	158	F11	2012	7	6	20	3	15	silver birch	1	1.6
G	158	F11	2012	7	6	20	3	15	silver birch	1	1.3
G	158	F11	2012	7	6	20	3	15	silver birch	1	1.7
G	158	F11	2012	7	6	20	3	15	silver birch	2	8.8
G	158	F11	2012	7	6	20	3	15	silver birch	3	2.7
G	158	F11	2012	7	6	20	3	15	silver birch	2	7.3
G	158	F11	2012	7	6	20	3	15	downy birch	4	31.3
G	158	F11	2012	7	6	20	3	15	downy birch	2	6.1
G	158	F11	2012	7	6	20	3	15	downy birch	2	7.6
G	158	F11	2012	7	6	20	3	15	downy birch	3	9.1
G	158	F11	2012	7	6	20	3	15	downy birch	2	5.2
G	158	F11	2012	7	7	0	0	0	silver birch	2	4.4
G	158	F11	2012	7	7	0	0	0	downy birch	2	5.9
G	158	F11	2012	7	7	0	0	0	downy birch	3	9.7
G	158	F11	2012	7	7	0	0	0	downy birch	3	9.8
G	158	F11	2012	7	8	0	0	4	Scots pine	2	4.7
G	158	F11	2012	8	1	0	0	10	silver birch	4	20.7
G	158	F11	2012	8	1	0	0	10	downy birch	1	2
G	158	F11	2012	8	1	0	0	10	downy birch	4	20
G	158	F11	2012	8	2	0	2	20	downy birch	1	5
G	158	F11	2012	8	2	0	2	20	downy birch	1	2
G	158	F11	2012	8	3	0	10	55
G	158	F11	2012	8	4	2	0	4
G	158	F11	2012	8	5	2	2	5
G	158	F11	2012	8	6	12	1	5	silver birch	3	2.6
G	158	F11	2012	8	6	12	1	5	downy birch	1	1
G	158	F11	2012	8	6	12	1	5	downy birch	1	1
G	158	F11	2012	8	6	12	1	5	downy birch	1	1
G	158	F11	2012	8	7	0	0	0	silver birch	4	29.6
G	158	F11	2012	8	7	0	0	0	downy birch	2	5.5
G	158	F11	2012	8	7	0	0	0	downy birch	4	22
G	158	F11	2012	8	7	0	0	0	downy birch	3	16.7
G	158	F11	2012	8	7	0	0	0	downy birch	3	8.8
G	158	F11	2012	8	7	0	0	0	downy birch	4	34
G	158	F11	2012	8	7	0	0	0	downy birch	3	28.4
G	158	F11	2012	8	8	3	3	12	silver birch	5	26
G	158	F11	2012	8	8	3	3	12	downy birch	3	30.5
G	158	F11	2012	8	8	3	3	12	downy birch	3	29
G	158	F11	2012	8	8	3	3	12	downy birch	3	34.5
G	158	F11	2012	9	1	15	0	3	downy birch	2	23.9
G	158	F11	2012	9	2	0	0	6
G	158	F11	2012	9	3	2	0	0	downy birch	2	13.1
G	158	F11	2012	9	3	2	0	0	Norway spruce	4	6
G	158	F11	2012	9	3	2	0	0	Norway spruce	4	15.8
G	158	F11	2012	9	3	2	0	0	Scots pine	3	4.1
G	158	F11	2012	9	3	2	0	0	Scots pine	3	21.6
G	158	F11	2012	9	3	2	0	0	Scots pine	3	4.5
G	158	F11	2012	9	4	0	0	0	Norway spruce	5	20
G	158	F11	2012	9	5	0	0	6	silver birch	2	20.4
G	158	F11	2012	9	5	0	0	6	downy birch	3	25.3
G	158	F11	2012	9	5	0	0	6	downy birch	2	8.2
G	158	F11	2012	9	6	23	0	3	silver birch	2	7.4
G	158	F11	2012	9	6	23	0	3	downy birch	3	20.7
G	158	F11	2012	9	6	23	0	3	downy birch	2	6.3
G	158	F11	2012	9	7	0	20	6	downy birch	2	13.5
G	158	F11	2012	9	7	0	20	6	downy birch	3	28.7
G	158	F11	2012	9	7	0	20	6	downy birch	4	30.6
G	158	F11	2012	9	7	0	20	6	downy birch	1	2.8
G	158	F11	2012	9	7	0	20	6	downy birch	1	7.1
G	158	F11	2012	9	7	0	20	6	Scots pine	3	3.7
G	158	F11	2012	9	8	3	0	0	downy birch	3	20
G	158	F11	2012	9	8	3	0	0	Norway spruce	13	18.5
G	158	F11	2012	9	8	3	0	0	Norway spruce	13	21
G	158	F11	2012	9	8	3	0	0	Norway spruce	8	7
G	158	F11	2012	9	8	3	0	0	Norway spruce	7	7.9
G	197	F14	2012	1	1	0	0	40	Scots pine	11	4.5
G	197	F14	2012	1	2	0	0	1	Scots pine	7	3.4
G	197	F14	2012	1	3	70	15	5	silver birch	4	15.3
G	197	F14	2012	1	3	70	15	5	silver birch	4	19.1
G	197	F14	2012	1	3	70	15	5	downy birch	2	0.9
G	197	F14	2012	1	3	70	15	5	downy birch	1	0.7
G	197	F14	2012	1	3	70	15	5	downy birch	2	0.6
G	197	F14	2012	1	3	70	15	5	Scots pine	4	0.9
G	197	F14	2012	1	3	70	15	5	Scots pine	2	7.9
G	197	F14	2012	1	4	20	3	3	silver birch	6	29.5
G	197	F14	2012	1	4	20	3	3	downy birch	2	3.1
G	197	F14	2012	1	4	20	3	3	downy birch	1	1.2
G	197	F14	2012	1	4	20	3	3	downy birch	1	1.4
G	197	F14	2012	1	4	20	3	3	downy birch	1	2.6
G	197	F14	2012	1	4	20	3	3	downy birch	1	1.3
G	197	F14	2012	1	4	20	3	3	Scots pine	1	1.6
G	197	F14	2012	1	4	20	3	3	Scots pine	1	1.2
G	197	F14	2012	1	5	10	1	6
G	197	F14	2012	1	6	75	10	2	silver birch	3	16.8
G	197	F14	2012	1	6	75	10	2	downy birch	1	0.3
G	197	F14	2012	1	6	75	10	2	downy birch	1	0.9
G	197	F14	2012	1	6	75	10	2	Scots pine	2	0.7
G	197	F14	2012	1	6	75	10	2	Scots pine	2	0.9
G	197	F14	2012	1	6	75	10	2	Scots pine	2	1.6
G	197	F14	2012	1	7	0	1	50
G	197	F14	2012	1	8	0	20	0
G	197	F14	2012	2	1	5	9	3
G	197	F14	2012	2	2	0	0	5
G	197	F14	2012	2	3	0	0	10
G	197	F14	2012	2	4	0	0	3
G	197	F14	2012	2	5	0	25	1
G	197	F14	2012	2	6	25	30	2	downy birch	1	1
G	197	F14	2012	2	6	25	30	2	Scots pine	2	0.2
G	197	F14	2012	2	7	0	50	1
G	197	F14	2012	2	8	7	25	4
G	197	F14	2012	3	1	14	0	2
G	197	F14	2012	3	2	0	0	1
G	197	F14	2012	3	3	0	0	6
G	197	F14	2012	3	4	12	8	50	downy birch	2	5.7
G	197	F14	2012	3	4	12	8	50	downy birch	1	1.1
G	197	F14	2012	3	4	12	8	50	downy birch	3	16.3
G	197	F14	2012	3	4	12	8	50	Scots pine	2	0.4
G	197	F14	2012	3	4	12	8	50	Scots pine	2	0.2
G	197	F14	2012	3	5	0	0	0
G	197	F14	2012	3	6	0	0	10
G	197	F14	2012	3	7	37	20	7	silver birch	4	36
G	197	F14	2012	3	7	37	20	7	silver birch	3	17.6
G	197	F14	2012	3	7	37	20	7	silver birch	5	30.1
G	197	F14	2012	3	7	37	20	7	silver birch	3	27.1
G	197	F14	2012	3	7	37	20	7	silver birch	3	12.7
G	197	F14	2012	3	7	37	20	7	silver birch	4	31.3
G	197	F14	2012	3	7	37	20	7	silver birch	1	3.4
G	197	F14	2012	3	7	37	20	7	silver birch	1	2.2
G	197	F14	2012	3	7	37	20	7	silver birch	4	24.7
G	197	F14	2012	3	7	37	20	7	silver birch	5	33.5
G	197	F14	2012	3	7	37	20	7	silver birch	3	21.9
G	197	F14	2012	3	7	37	20	7	Scots pine	3	3.2
G	197	F14	2012	3	7	37	20	7	Scots pine	3	1.7
G	197	F14	2012	3	8	6	5	2	silver birch	1	3.4
G	197	F14	2012	3	8	6	5	2	silver birch	3	5.4
G	197	F14	2012	3	8	6	5	2	silver birch	3	8.6
G	197	F14	2012	3	8	6	5	2	Scots pine	3	6.1
G	197	F14	2012	4	1	0	10	1
G	197	F14	2012	4	2	0	20	2	Scots pine	5	16
G	197	F14	2012	4	3	3	40	10
G	197	F14	2012	4	4	0	3	3	Scots pine	1	1.8
G	197	F14	2012	4	5	0	22	2
G	197	F14	2012	4	6	3	10	30
G	197	F14	2012	4	7	3	55	10
G	197	F14	2012	4	8	27	0	2
G	197	F14	2012	5	1	5	5	25	silver birch	1	3.3
G	197	F14	2012	5	1	5	5	25	silver birch	2	13.4
G	197	F14	2012	5	2	0	40	3
G	197	F14	2012	5	3	50	3	20
G	197	F14	2012	5	4	45	2	7
G	197	F14	2012	5	5	0	2	1
G	197	F14	2012	5	6	0	2	2
G	197	F14	2012	5	7	50	0	5	downy birch	1	0.7
G	197	F14	2012	5	8	11	0	10
G	197	F14	2012	6	1	75	20	3
G	197	F14	2012	6	2	20	9	3	silver birch	5	43
G	197	F14	2012	6	3	0	8	1
G	197	F14	2012	6	4	0	0	2
G	197	F14	2012	6	5	0	1	2	Scots pine	4	3.9
G	197	F14	2012	6	6	3	12	2
G	197	F14	2012	6	7	9	1	10	downy birch	2	12.3
G	197	F14	2012	6	7	9	1	10	downy birch	2	11.4
G	197	F14	2012	6	7	9	1	10	downy birch	3	12.5
G	197	F14	2012	6	8	18	30	5	silver birch	2	15.6
G	197	F14	2012	6	8	18	30	5	silver birch	4	14.3
G	197	F14	2012	6	8	18	30	5	silver birch	3	28
G	197	F14	2012	7	1	0	0	0
G	197	F14	2012	7	2	0	0	0
G	197	F14	2012	7	3	0	0	0
G	197	F14	2012	7	4	0	0	0
G	197	F14	2012	7	5	0	5	0
G	197	F14	2012	7	6	0	3	1
G	197	F14	2012	7	7	0	0	2
G	197	F14	2012	7	8	0	4	10
G	197	F14	2012	8	1	25	25	1
G	197	F14	2012	8	2	3	7	0
G	197	F14	2012	8	3	6	10	4	downy birch	1	0.4
G	197	F14	2012	8	4	15	2	2	silver birch	3	15.2
G	197	F14	2012	8	4	15	2	2	silver birch	3	24.1
G	197	F14	2012	8	4	15	2	2	downy birch	2	9.6
G	197	F14	2012	8	5	15	18	10	silver birch	1	5.3
G	197	F14	2012	8	5	15	18	10	silver birch	1	3.9
G	197	F14	2012	8	5	15	18	10	silver birch	1	1.6
G	197	F14	2012	8	6	7	9	8	silver birch	4	33
G	197	F14	2012	8	7	35	10	11	downy birch	1	0.9
G	197	F14	2012	8	8	20	5	1	downy birch	4	33.6
G	197	F14	2012	8	8	20	5	1	downy birch	1	0.8
G	197	F14	2012	8	8	20	5	1	downy birch	1	0.7
G	197	F14	2012	9	1	12	8	1	downy birch	1	1.1
G	197	F14	2012	9	1	12	8	1	Scots pine	1	1.5
G	197	F14	2012	9	2	5	20	8	downy birch	2	9.8
G	197	F14	2012	9	2	5	20	8	downy birch	2	21.1
G	197	F14	2012	9	2	5	20	8	Scots pine	3	7.9
G	197	F14	2012	9	3	0	3	0	Scots pine	5	3.8
G	197	F14	2012	9	4	0	15	10
G	197	F14	2012	9	5	0	0	2
G	197	F14	2012	9	6	0	0	1	Scots pine	2	1.2
G	197	F14	2012	9	7	4	25	2	silver birch	3	25.7
G	197	F14	2012	9	7	4	25	2	Scots pine	3	3.1
G	197	F14	2012	9	8	0	35	1
G	197	F14	2012	10	1	25	0	1
G	197	F14	2012	10	2	25	35	5	downy birch	3	12.7
G	197	F14	2012	10	2	25	35	5	downy birch	2	10.1
G	197	F14	2012	10	3	0	6	0	Scots pine	2	1.1
G	197	F14	2012	10	4	10	4	2	downy birch	2	2.8
G	197	F14	2012	10	4	10	4	2	downy birch	1	1.2
G	197	F14	2012	10	4	10	4	2	Scots pine	2	2.7
G	197	F14	2012	10	4	10	4	2	Scots pine	2	1.5
G	197	F14	2012	10	5	3	2	2	silver birch	3	19.4
G	197	F14	2012	10	5	3	2	2	downy birch	2	23.2
G	197	F14	2012	10	5	3	2	2	downy birch	3	30.2
G	197	F14	2012	10	5	3	2	2	Scots pine	2	3.4
G	197	F14	2012	10	6	0	5	0
G	197	F14	2012	10	7	0	20	1	downy birch	3	12.5
G	197	F14	2012	10	7	0	20	1	downy birch	3	11.8
G	197	F14	2012	10	8	0	0	1
G	38	F11	2014	1	1	0	0	25
G	38	F11	2014	1	2	0	0	10
G	38	F11	2014	1	3	0	0	60
G	38	F11	2014	1	4	0	0	25
G	38	F11	2014	1	5	0	0	5
G	38	F11	2014	1	6	0	0	6
G	38	F11	2014	1	7	0	8	0
G	38	F11	2014	1	8	0	0	0
G	38	F14	2014	2	1	0	45	2
G	38	F14	2014	2	2	17	75	3
G	38	F14	2014	2	3	25	7	8
G	38	F14	2014	2	4	30	10	10	downy birch	1	1.2
G	38	F14	2014	2	5	0	32	3
G	38	F14	2014	2	6	0	36	2	downy birch	1	2.9
G	38	F14	2014	2	6	0	36	2	downy birch	2	3.4
G	38	F14	2014	2	7	25	0	2	downy birch	1	2.1
G	38	F14	2014	2	8	90	0	2	downy birch	1	0.9
G	38	F14	2014	2	8	90	0	2	downy birch	1	0.4
G	38	F14	2014	2	8	90	0	2	downy birch	1	1.3
G	38	F14	2014	2	8	90	0	2	downy birch	1	0.5
G	38	F14	2014	2	8	90	0	2	downy birch	1	0.5
G	38	F14	2014	2	8	90	0	2	downy birch	1	0.3
G	38	F14	2014	2	8	90	0	2	downy birch	1	1.8
G	38	F11	2014	3	1	20	4	8	downy birch	1	1
G	38	F11	2014	3	2	12	40	10
G	38	F11	2014	3	3	18	12	25
G	38	F11	2014	3	4	40	50	10	downy birch	2	1
G	38	F11	2014	3	4	40	50	10	downy birch	1	0.2
G	38	F11	2014	3	5	15	2	0
G	38	F11	2014	3	6	25	45	21	downy birch	1	0.5
G	38	F11	2014	3	7	11	2	3
G	38	F11	2014	3	8	28	40	4
G	38	F11	2013	4	1	0	3	6
G	38	F11	2013	4	2	73	24	3	downy birch	1	1.3
G	38	F11	2013	4	2	73	24	3	downy birch	1	0.8
G	38	F11	2013	4	2	73	24	3	downy birch	1	1.2
G	38	F11	2013	4	2	73	24	3	downy birch	1	0.9
G	38	F11	2013	4	2	73	24	3	downy birch	1	0.9
G	38	F11	2013	4	2	73	24	3	downy birch	1	1
G	38	F11	2013	4	2	73	24	3	downy birch	1	0.7
G	38	F11	2013	4	2	73	24	3	downy birch	1	0.3
G	38	F11	2013	4	2	73	24	3	downy birch	1	0.5
G	38	F11	2013	4	2	73	24	3	downy birch	1	0.8
G	38	F11	2013	4	2	73	24	3	downy birch	1	0.8
G	38	F11	2013	4	2	73	24	3	downy birch	1	0.8
G	38	F11	2013	4	2	73	24	3	downy birch	1	0.8
G	38	F11	2013	4	2	73	24	3	downy birch	1	0.8
G	38	F11	2013	4	2	73	24	3	downy birch	1	0.8
G	38	F11	2013	4	3	45	30	20	downy birch	1	0.4
G	38	F11	2013	4	3	45	30	20	downy birch	1	1.2
G	38	F11	2013	4	3	45	30	20	downy birch	1	0.5
G	38	F11	2013	4	3	45	30	20	downy birch	1	0.5
G	38	F11	2013	4	3	45	30	20	downy birch	1	1
G	38	F11	2013	4	3	45	30	20	downy birch	1	0.8
G	38	F11	2013	4	3	45	30	20	downy birch	1	0.9
G	38	F11	2013	4	3	45	30	20	downy birch	1	0.3
G	38	F11	2013	4	3	45	30	20	downy birch	1	0.5
G	38	F11	2013	4	3	45	30	20	downy birch	1	0.2
G	38	F11	2013	4	3	45	30	20	downy birch	1	0.6
G	38	F11	2013	4	3	45	30	20	downy birch	1	0.6
G	38	F11	2013	4	3	45	30	20	downy birch	1	0.6
G	38	F11	2013	4	3	45	30	20	downy birch	1	0.6
G	38	F11	2013	4	3	45	30	20	downy birch	1	0.6
G	38	F11	2013	4	3	45	30	20	downy birch	1	0.6
G	38	F11	2013	4	3	45	30	20	downy birch	1	0.6
G	38	F11	2013	4	3	45	30	20	downy birch	1	0.6
G	38	F11	2013	4	3	45	30	20	downy birch	1	0.6
G	38	F11	2013	4	4	0	70	3	downy birch	1	0.2
G	38	F11	2013	4	4	0	70	3	downy birch	1	0.3
G	38	F11	2013	4	5	8	35	12	downy birch	1	0.7
G	38	F11	2013	4	5	8	35	12	downy birch	1	0.8
G	38	F11	2013	4	5	8	35	12	downy birch	1	0.3
G	38	F11	2013	4	5	8	35	12	downy birch	1	0.6
G	38	F11	2013	4	5	8	35	12	downy birch	1	1.4
G	38	F11	2013	4	5	8	35	12	downy birch	1	1.1
G	38	F11	2013	4	6	50	4	15	downy birch	1	0.8
G	38	F11	2013	4	6	50	4	15	downy birch	1	1.7
G	38	F11	2013	4	6	50	4	15	downy birch	1	0.8
G	38	F11	2013	4	6	50	4	15	downy birch	1	0.9
G	38	F11	2013	4	6	50	4	15	downy birch	1	1.3
G	38	F11	2013	4	7	83	8	10	downy birch	1	0.5
G	38	F11	2013	4	7	83	8	10	downy birch	1	0.7
G	38	F11	2013	4	7	83	8	10	downy birch	1	0.9
G	38	F11	2013	4	7	83	8	10	downy birch	1	0.8
G	38	F11	2013	4	7	83	8	10	downy birch	1	0.3
G	38	F11	2013	4	7	83	8	10	downy birch	1	1.3
G	38	F11	2013	4	7	83	8	10	downy birch	1	0.3
G	38	F11	2013	4	7	83	8	10	downy birch	1	0.8
G	38	F11	2013	4	7	83	8	10	downy birch	1	1.3
G	38	F11	2013	4	7	83	8	10	downy birch	1	1.6
G	38	F11	2013	4	7	83	8	10	downy birch	1	0.9
G	38	F11	2013	4	7	83	8	10	downy birch	1	0.9
G	38	F11	2013	4	7	83	8	10	downy birch	1	0.9
G	38	F11	2013	4	7	83	8	10	downy birch	1	0.9
G	38	F11	2013	4	7	83	8	10	downy birch	1	0.9
G	38	F11	2013	4	7	83	8	10	downy birch	1	0.9
G	38	F11	2013	4	7	83	8	10	downy birch	1	0.9
G	38	F11	2013	4	7	83	8	10	downy birch	1	0.9
G	38	F11	2013	4	7	83	8	10	downy birch	1	0.9
G	38	F11	2013	4	7	83	8	10	downy birch	1	0.9
G	38	F11	2013	4	7	83	8	10	downy birch	1	0.9
G	38	F11	2013	4	7	83	8	10	downy birch	1	0.9
G	38	F11	2013	4	7	83	8	10	downy birch	1	0.9
G	38	F11	2013	4	7	83	8	10	downy birch	1	0.9
G	38	F11	2013	4	7	83	8	10	downy birch	1	0.9
G	38	F11	2013	4	7	83	8	10	downy birch	1	0.9
G	38	F11	2013	4	7	83	8	10	downy birch	1	0.9
G	38	F11	2013	4	7	83	8	10	downy birch	1	0.9
G	38	F11	2013	4	7	83	8	10	downy birch	1	0.9
G	38	F11	2013	4	7	83	8	10	downy birch	1	0.9
G	38	F11	2013	4	7	83	8	10	downy birch	1	0.9
G	38	F11	2013	4	7	83	8	10	downy birch	1	0.9
G	38	F11	2013	4	7	83	8	10	downy birch	1	0.9
G	38	F11	2013	4	7	83	8	10	downy birch	1	0.9
G	38	F11	2013	4	7	83	8	10	downy birch	1	0.9
G	38	F11	2013	4	7	83	8	10	downy birch	1	0.9
G	38	F11	2013	4	7	83	8	10	downy birch	1	0.9
G	38	F11	2013	4	7	83	8	10	downy birch	1	0.9
G	38	F11	2013	4	7	83	8	10	downy birch	1	0.9
G	38	F11	2013	4	7	83	8	10	downy birch	1	0.9
G	38	F11	2013	4	7	83	8	10	downy birch	1	0.9
G	38	F11	2013	4	7	83	8	10	downy birch	1	0.9
G	38	F11	2013	4	8	70	17	10	downy birch	1	0.6
G	38	F11	2013	4	8	70	17	10	downy birch	1	0.7
G	38	F11	2013	4	8	70	17	10	downy birch	1	0.4
G	38	F11	2013	4	8	70	17	10	downy birch	1	1.6
G	38	F11	2013	4	8	70	17	10	downy birch	1	0.7
G	38	F11	2013	4	8	70	17	10	downy birch	1	0.8
G	38	F11	2013	4	8	70	17	10	downy birch	1	0.5
G	38	F11	2013	4	8	70	17	10	downy birch	1	0.3
G	38	F11	2013	5	1	0	83	2	Scots pine	1	1.1
G	38	F11	2013	5	2	60	25	12	downy birch	1	0.3
G	38	F11	2013	5	2	60	25	12	downy birch	1	0.4
G	38	F11	2013	5	2	60	25	12	Scots pine	3	6.3
G	38	F11	2013	5	2	60	25	12	Scots pine	2	0.9
G	38	F11	2013	5	3	17	25	5	downy birch	1	1.8
G	38	F11	2013	5	3	17	25	5	downy birch	1	0.2
G	38	F11	2013	5	3	17	25	5	downy birch	1	0.2
G	38	F11	2013	5	3	17	25	5	downy birch	1	0.2
G	38	F11	2013	5	3	17	25	5	downy birch	1	0.2
G	38	F11	2013	5	3	17	25	5	downy birch	1	0.2
G	38	F11	2013	5	3	17	25	5	downy birch	1	0.1
G	38	F11	2013	5	3	17	25	5	downy birch	1	0.1
G	38	F11	2013	5	3	17	25	5	downy birch	1	0.5
G	38	F11	2013	5	3	17	25	5	downy birch	1	1
G	38	F11	2013	5	3	17	25	5	downy birch	1	0.5
G	38	F11	2013	5	3	17	25	5	downy birch	1	0.5
G	38	F11	2013	5	3	17	25	5	downy birch	1	0.5
G	38	F11	2013	5	3	17	25	5	downy birch	1	0.5
G	38	F11	2013	5	3	17	25	5	downy birch	1	0.5
G	38	F11	2013	5	3	17	25	5	downy birch	1	0.5
G	38	F11	2013	5	3	17	25	5	downy birch	1	0.5
G	38	F11	2013	5	3	17	25	5	downy birch	1	0.5
G	38	F14	2013	5	4	70	3	15	birch unspecified	1	0.3
G	38	F14	2013	5	4	70	3	15	birch unspecified	1	0.3
G	38	F14	2013	5	4	70	3	15	birch unspecified	1	0.4
G	38	F14	2013	5	4	70	3	15	birch unspecified	1	0.2
G	38	F14	2013	5	4	70	3	15	birch unspecified	1	0.1
G	38	F14	2013	5	4	70	3	15	birch unspecified	1	0.2
G	38	F14	2013	5	4	70	3	15	birch unspecified	1	0.1
G	38	F14	2013	5	4	70	3	15	birch unspecified	1	0.1
G	38	F14	2013	5	4	70	3	15	birch unspecified	1	1.2
G	38	F14	2013	5	4	70	3	15	birch unspecified	1	1
G	38	F14	2013	5	4	70	3	15	birch unspecified	1	0.4
G	38	F14	2013	5	4	70	3	15	birch unspecified	1	0.4
G	38	F14	2013	5	4	70	3	15	birch unspecified	1	0.4
G	38	F14	2013	5	4	70	3	15	birch unspecified	1	0.4
G	38	F14	2013	5	4	70	3	15	birch unspecified	1	0.4
G	38	F14	2013	5	4	70	3	15	birch unspecified	1	0.4
G	38	F14	2013	5	4	70	3	15	birch unspecified	1	0.4
G	38	F14	2013	5	4	70	3	15	birch unspecified	1	0.4
G	38	F14	2013	5	4	70	3	15	birch unspecified	1	0.4
G	38	F14	2013	5	4	70	3	15	birch unspecified	1	0.4
G	38	F14	2013	5	4	70	3	15	birch unspecified	1	0.4
G	38	F14	2013	5	4	70	3	15	birch unspecified	1	0.4
G	38	F14	2013	5	4	70	3	15	birch unspecified	1	0.4
G	38	F14	2013	5	4	70	3	15	birch unspecified	1	0.4
G	38	F14	2013	5	4	70	3	15	birch unspecified	1	0.4
G	38	F14	2013	5	5	18	0	5	downy birch	1	0.1
G	38	F14	2013	5	6	5	50	15	downy birch	1	0.2
G	38	F14	2013	5	7	15	35	9	downy birch	1	0.3
G	38	F14	2013	5	7	15	35	9	Scots pine	2	0.1
G	38	F14	2013	5	8	30	5	18	downy birch	1	0.3
G	38	F14	2013	5	8	30	5	18	downy birch	1	0.2
G	38	F14	2013	5	8	30	5	18	downy birch	1	0.2
G	38	F14	2013	5	8	30	5	18	downy birch	1	0.1
G	38	F14	2013	5	8	30	5	18	downy birch	1	0.2
G	38	F14	2013	5	8	30	5	18	downy birch	1	0.1
G	38	F14	2013	5	8	30	5	18	downy birch	1	0.1
G	38	F14	2013	5	8	30	5	18	downy birch	1	0.1
G	38	F14	2013	5	8	30	5	18	Scots pine	3	1.5
G	38	F11	2013	6	1	0	4	3
G	38	F11	2013	6	2	0	30	0
G	38	F11	2013	6	3	5	85	10	downy birch	2	1.7
G	38	F11	2013	6	3	5	85	10	downy birch	1	0.5
G	38	F11	2013	6	3	5	85	10	downy birch	1	0.8
G	38	F11	2013	6	3	5	85	10	downy birch	1	0.6
G	38	F11	2013	6	3	5	85	10	downy birch	1	0.4
G	38	F11	2013	6	4	4	90	3	downy birch	2	10.7
G	38	F11	2013	6	4	4	90	3	downy birch	1	0.5
G	38	F11	2013	6	4	4	90	3	downy birch	1	0.9
G	38	F11	2013	6	4	4	90	3	downy birch	1	0.8
G	38	F11	2013	6	4	4	90	3	Scots pine	1	2.3
G	38	F11	2013	6	4	4	90	3	Scots pine	2	1.6
G	38	F11	2013	6	4	4	90	3	Scots pine	1	2
G	38	F11	2013	6	4	4	90	3	Scots pine	2	1.9
G	38	F11	2013	6	5	1	4	7	downy birch	3	2
G	38	F11	2013	6	6	0	3	5	downy birch	1	1.1
G	38	F11	2013	6	6	0	3	5	downy birch	1	0.8
G	38	F11	2013	6	6	0	3	5	downy birch	1	0.5
G	38	F11	2013	6	6	0	3	5	downy birch	1	0.9
G	38	F11	2013	6	6	0	3	5	downy birch	1	0.7
G	38	F11	2013	6	7	0	30	3	downy birch	2	1.6
G	38	F11	2013	6	7	0	30	3	willow	2	1.1
G	38	F11	2013	6	8	0	0	3
G	38	F11	2013	7	1	0	2	8
G	38	F11	2013	7	2	20	3	12
G	38	F11	2013	7	3	30	30	6	downy birch	1	0.4
G	38	F11	2013	7	4	67	3	30	downy birch	1	0.2
G	38	F11	2013	7	4	67	3	30	downy birch	1	0.2
G	38	F11	2013	7	4	67	3	30	downy birch	1	0.3
G	38	F11	2013	7	4	67	3	30	downy birch	1	0.1
G	38	F11	2013	7	4	67	3	30	downy birch	1	0.3
G	38	F11	2013	7	4	67	3	30	downy birch	1	0.1
G	38	F11	2013	7	4	67	3	30	downy birch	1	0.2
G	38	F11	2013	7	4	67	3	30	downy birch	1	0.3
G	38	F11	2013	7	4	67	3	30	downy birch	1	0.3
G	38	F11	2013	7	4	67	3	30	downy birch	1	0.2
G	38	F11	2013	7	5	0	20	40	downy birch	1	0.5
G	38	F11	2013	7	5	0	20	40	Scots pine	2	1.2
G	38	F11	2013	7	6	0	0	35
G	38	F11	2013	7	7	0	7	8	downy birch	1	1.8
G	38	F11	2013	7	7	0	7	8	downy birch	1	1.4
G	38	F11	2013	7	8	10	75	5	downy birch	1	1.2
G	38	F11	2013	7	8	10	75	5	downy birch	1	0.6
G	38	F11	2013	7	8	10	75	5	downy birch	1	0.4
G	38	F11	2013	7	8	10	75	5	downy birch	1	0.9
G	38	F11	2013	8	1	0	1	12
G	38	F11	2013	8	2	0	0	6
G	38	F11	2013	8	3	0	0	0
G	38	F11	2013	8	4	0	0	1
G	38	F11	2013	8	5	0	7	0	downy birch	1	0.5
G	38	F11	2013	8	5	0	7	0	downy birch	1	0.5
G	38	F11	2013	8	6	0	95	1	Scots pine	1	1.7
G	38	F11	2013	8	7	60	35	3
G	38	F11	2013	8	8	0	60	0
G	38	F11	2014	9	1	0	0	4
G	38	F11	2014	9	2	3	45	4	Scots pine	1	2
G	38	F11	2014	9	3	40	15	10	downy birch	1	1.2
G	38	F11	2014	9	3	40	15	10	Scots pine	1	1.6
G	38	F11	2014	9	4	50	35	5	Scots pine	2	1.5
G	38	F11	2014	9	4	50	35	5	Scots pine	2	1.4
G	38	F11	2014	9	5	35	30	25
G	38	F11	2014	9	6	0	55	10	downy birch	3	43.8
G	38	F11	2014	9	6	0	55	10	downy birch	2	21.2
G	38	F11	2014	9	6	0	55	10	Scots pine	2	1.6
G	38	F11	2014	9	7	0	10	4
G	38	F11	2014	9	8	0	15	5	Scots pine	2	2.1
G	38	F11	2014	10	1	0	0	70
G	38	F11	2014	10	2	0	10	15
G	38	F11	2014	10	3	93	3	4	downy birch	1	0.2
G	38	F11	2014	10	3	93	3	4	downy birch	1	0.4
G	38	F11	2014	10	3	93	3	4	Scots pine	1	1
G	38	F11	2014	10	3	93	3	4	Scots pine	2	1.5
G	38	F11	2014	10	4	78	12	10	downy birch	1	0.3
G	38	F11	2014	10	4	78	12	10	downy birch	1	0.1
G	38	F11	2014	10	4	78	12	10	downy birch	1	0.5
G	38	F11	2014	10	4	78	12	10	downy birch	1	0.5
G	38	F11	2014	10	4	78	12	10	Scots pine	2	1.2
G	38	F11	2014	10	4	78	12	10	Scots pine	1	1
G	38	F11	2014	10	5	40	6	10	Scots pine	2	0.1
G	38	F11	2014	10	5	40	6	10	Scots pine	1	1.4
G	38	F11	2014	10	5	40	6	10	Scots pine	1	1
G	38	F11	2014	10	6	55	8	6	downy birch	1	0.6
G	38	F11	2014	10	6	55	8	6	Scots pine	1	1.2
G	38	F11	2014	10	6	55	8	6	Scots pine	1	1.1
G	38	F11	2014	10	7	25	4	8
G	38	F11	2014	10	8	80	5	11	Scots pine	1	1.9
G	48	F14	2013	1	1	0	15	0
G	48	F14	2013	1	2	0	0	4
G	48	F14	2013	1	3	0	0	1
G	48	F14	2013	1	4	0	1	2	downy birch	3	19.7
G	48	F14	2013	1	5	50	0	15	downy birch	1	0.8
G	48	F14	2013	1	5	50	0	15	downy birch	1	0.7
G	48	F14	2013	1	5	50	0	15	downy birch	1	0.3
G	48	F14	2013	1	5	50	0	15	downy birch	1	1
G	48	F14	2013	1	5	50	0	15	downy birch	1	1.5
G	48	F14	2013	1	5	50	0	15	downy birch	1	1.7
G	48	F14	2013	1	5	50	0	15	downy birch	1	1.5
G	48	F14	2013	1	5	50	0	15	downy birch	1	1.3
G	48	F14	2013	1	5	50	0	15	downy birch	2	17.3
G	48	F14	2013	1	5	50	0	15	downy birch	1	1.3
G	48	F14	2013	1	5	50	0	15	downy birch	1	3
G	48	F14	2013	1	5	50	0	15	downy birch	1	3
G	48	F14	2013	1	5	50	0	15	downy birch	1	3
G	48	F14	2013	1	5	50	0	15	downy birch	1	3
G	48	F14	2013	1	5	50	0	15	downy birch	1	3
G	48	F14	2013	1	5	50	0	15	downy birch	1	3
G	48	F14	2013	1	5	50	0	15	downy birch	1	3
G	48	F14	2013	1	5	50	0	15	downy birch	1	3
G	48	F14	2013	1	5	50	0	15	downy birch	1	3
G	48	F14	2013	1	5	50	0	15	downy birch	1	3
G	48	F14	2013	1	5	50	0	15	downy birch	1	3
G	48	F14	2013	1	5	50	0	15	downy birch	1	3
G	48	F14	2013	1	5	50	0	15	downy birch	1	3
G	48	F14	2013	1	5	50	0	15	downy birch	1	3
G	48	F14	2013	1	5	50	0	15	downy birch	1	3
G	48	F14	2013	1	5	50	0	15	downy birch	1	3
G	48	F14	2013	1	5	50	0	15	downy birch	1	3
G	48	F14	2013	1	5	50	0	15	downy birch	1	3
G	48	F14	2013	1	5	50	0	15	downy birch	1	3
G	48	F14	2013	1	5	50	0	15	downy birch	1	3
G	48	F14	2013	1	5	50	0	15	downy birch	1	3
G	48	F14	2013	1	5	50	0	15	downy birch	1	3
G	48	F14	2013	1	5	50	0	15	downy birch	1	3
G	48	F14	2013	1	5	50	0	15	downy birch	1	3
G	48	F14	2013	1	5	50	0	15	downy birch	1	3
G	48	F14	2013	1	5	50	0	15	downy birch	1	3
G	48	F14	2013	1	5	50	0	15	downy birch	1	3
G	48	F14	2013	1	5	50	0	15	downy birch	1	3
G	48	F14	2013	1	5	50	0	15	downy birch	1	3
G	48	F14	2013	1	5	50	0	15	downy birch	1	3
G	48	F14	2013	1	5	50	0	15	downy birch	1	3
G	48	F14	2013	1	5	50	0	15	downy birch	1	3
G	48	F14	2013	1	5	50	0	15	downy birch	1	3
G	48	F14	2013	1	5	50	0	15	downy birch	1	3
G	48	F14	2013	1	5	50	0	15	downy birch	1	3
G	48	F14	2013	1	5	50	0	15	downy birch	1	3
G	48	F14	2013	1	5	50	0	15	downy birch	1	3
G	48	F14	2013	1	5	50	0	15	downy birch	1	3
G	48	F14	2013	1	5	50	0	15	downy birch	1	3
G	48	F14	2013	1	5	50	0	15	downy birch	1	3
G	48	F14	2013	1	5	50	0	15	downy birch	1	3
G	48	F14	2013	1	5	50	0	15	downy birch	1	3
G	48	F14	2013	1	5	50	0	15	downy birch	1	3
G	48	F14	2013	1	5	50	0	15	downy birch	1	3
G	48	F14	2013	1	5	50	0	15	downy birch	1	3
G	48	F14	2013	1	5	50	0	15	downy birch	1	3
G	48	F14	2013	1	5	50	0	15	downy birch	1	3
G	48	F14	2013	1	5	50	0	15	downy birch	1	3
G	48	F14	2013	1	5	50	0	15	downy birch	1	3
G	48	F14	2013	1	5	50	0	15	downy birch	1	3
G	48	F14	2013	1	6	0	50	10	downy birch	1	0.7
G	48	F14	2013	1	6	0	50	10	downy birch	1	0.9
G	48	F14	2013	1	6	0	50	10	downy birch	1	0.8
G	48	F14	2013	1	6	0	50	10	downy birch	1	0.8
G	48	F14	2013	1	6	0	50	10	downy birch	1	0.7
G	48	F14	2013	1	6	0	50	10	downy birch	1	0.1
G	48	F14	2013	1	6	0	50	10	downy birch	1	0.1
G	48	F14	2013	1	6	0	50	10	downy birch	1	1.5
G	48	F14	2013	1	6	0	50	10	downy birch	1	1.6
G	48	F14	2013	1	6	0	50	10	downy birch	1	0.7
G	48	F14	2013	1	6	0	50	10	downy birch	1	1.7
G	48	F14	2013	1	6	0	50	10	downy birch	1	0.8
G	48	F14	2013	1	6	0	50	10	downy birch	1	0.8
G	48	F14	2013	1	6	0	50	10	downy birch	1	0.8
G	48	F14	2013	1	6	0	50	10	downy birch	1	0.8
G	48	F14	2013	1	6	0	50	10	downy birch	1	0.8
G	48	F14	2013	1	6	0	50	10	downy birch	1	0.8
G	48	F14	2013	1	6	0	50	10	downy birch	1	0.8
G	48	F14	2013	1	6	0	50	10	downy birch	1	0.8
G	48	F14	2013	1	6	0	50	10	downy birch	1	0.8
G	48	F14	2013	1	6	0	50	10	downy birch	1	0.8
G	48	F14	2013	1	6	0	50	10	downy birch	1	0.8
G	48	F14	2013	1	6	0	50	10	downy birch	1	0.8
G	48	F14	2013	1	6	0	50	10	downy birch	1	0.8
G	48	F14	2013	1	6	0	50	10	downy birch	1	0.8
G	48	F14	2013	1	6	0	50	10	downy birch	1	0.8
G	48	F14	2013	1	6	0	50	10	downy birch	1	0.8
G	48	F14	2013	1	6	0	50	10	downy birch	1	0.8
G	48	F14	2013	1	6	0	50	10	downy birch	1	0.8
G	48	F14	2013	1	6	0	50	10	downy birch	1	0.8
G	48	F14	2013	1	6	0	50	10	downy birch	1	0.8
G	48	F14	2013	1	6	0	50	10	downy birch	1	0.8
G	48	F14	2013	1	6	0	50	10	downy birch	1	0.8
G	48	F14	2013	1	6	0	50	10	downy birch	1	0.8
G	48	F14	2013	1	6	0	50	10	downy birch	1	0.8
G	48	F14	2013	1	6	0	50	10	downy birch	1	0.8
G	48	F14	2013	1	6	0	50	10	downy birch	1	0.8
G	48	F14	2013	1	6	0	50	10	downy birch	1	0.8
G	48	F14	2013	1	6	0	50	10	downy birch	1	0.8
G	48	F14	2013	1	6	0	50	10	downy birch	1	0.8
G	48	F14	2013	1	6	0	50	10	downy birch	1	0.8
G	48	F14	2013	1	6	0	50	10	downy birch	1	0.8
G	48	F14	2013	1	6	0	50	10	downy birch	1	0.8
G	48	F14	2013	1	6	0	50	10	downy birch	1	0.8
G	48	F14	2013	1	7	28	0	10	downy birch	1	0.5
G	48	F14	2013	1	7	28	0	10	downy birch	1	0.8
G	48	F14	2013	1	7	28	0	10	downy birch	1	1
G	48	F14	2013	1	7	28	0	10	downy birch	1	1.1
G	48	F14	2013	1	7	28	0	10	downy birch	1	0.6
G	48	F14	2013	1	7	28	0	10	downy birch	1	0.6
G	48	F14	2013	1	7	28	0	10	downy birch	1	0.5
G	48	F14	2013	1	7	28	0	10	downy birch	1	0.6
G	48	F14	2013	1	7	28	0	10	downy birch	1	0.8
G	48	F14	2013	1	7	28	0	10	downy birch	1	0.7
G	48	F14	2013	1	7	28	0	10	downy birch	1	0.7
G	48	F14	2013	1	7	28	0	10	downy birch	1	0.7
G	48	F14	2013	1	7	28	0	10	downy birch	1	0.7
G	48	F14	2013	1	7	28	0	10	downy birch	1	0.7
G	48	F14	2013	1	7	28	0	10	downy birch	1	0.7
G	48	F14	2013	1	7	28	0	10	downy birch	1	0.7
G	48	F14	2013	1	7	28	0	10	downy birch	1	0.7
G	48	F14	2013	1	7	28	0	10	downy birch	1	0.7
G	48	F14	2013	1	7	28	0	10	downy birch	1	0.7
G	48	F14	2013	1	7	28	0	10	downy birch	1	0.7
G	48	F14	2013	1	7	28	0	10	downy birch	1	0.7
G	48	F14	2013	1	7	28	0	10	downy birch	1	0.7
G	48	F14	2013	1	7	28	0	10	downy birch	1	0.7
G	48	F14	2013	1	7	28	0	10	downy birch	1	0.7
G	48	F14	2013	1	7	28	0	10	downy birch	1	0.7
G	48	F14	2013	1	7	28	0	10	downy birch	1	0.7
G	48	F14	2013	1	7	28	0	10	downy birch	1	0.7
G	48	F14	2013	1	7	28	0	10	downy birch	1	0.7
G	48	F14	2013	1	7	28	0	10	downy birch	1	0.7
G	48	F14	2013	1	7	28	0	10	downy birch	1	0.7
G	48	F14	2013	1	7	28	0	10	downy birch	1	0.7
G	48	F14	2013	1	7	28	0	10	downy birch	1	0.7
G	48	F14	2013	1	7	28	0	10	downy birch	1	0.7
G	48	F14	2013	1	7	28	0	10	downy birch	1	0.7
G	48	F14	2013	1	7	28	0	10	downy birch	1	0.7
G	48	F14	2013	1	7	28	0	10	downy birch	1	0.7
G	48	F14	2013	1	7	28	0	10	downy birch	1	0.7
G	48	F14	2013	1	7	28	0	10	downy birch	1	0.7
G	48	F14	2013	1	7	28	0	10	downy birch	1	0.7
G	48	F14	2013	1	7	28	0	10	downy birch	1	0.7
G	48	F14	2013	1	7	28	0	10	downy birch	1	0.7
G	48	F14	2013	1	7	28	0	10	downy birch	1	0.7
G	48	F14	2013	1	7	28	0	10	downy birch	1	0.7
G	48	F14	2013	1	7	28	0	10	downy birch	1	0.7
G	48	F14	2013	1	7	28	0	10	downy birch	1	0.7
G	48	F14	2013	1	7	28	0	10	downy birch	1	0.7
G	48	F14	2013	1	7	28	0	10	downy birch	1	0.7
G	48	F14	2013	1	7	28	0	10	downy birch	1	0.7
G	48	F14	2013	1	7	28	0	10	Scots pine	1	1.6
G	48	F14	2013	1	7	28	0	10	willow	2	4.1
G	48	F14	2013	1	8	1	5	10	downy birch	1	1.2
G	48	F14	2013	1	8	1	5	10	downy birch	3	14.9
G	48	F14	2013	2	1	0	0	50	downy birch	2	4.5
G	48	F14	2013	2	1	0	0	50	downy birch	2	3.4
G	48	F14	2013	2	1	0	0	50	downy birch	1	3
G	48	F14	2013	2	1	0	0	50	downy birch	1	1
G	48	F14	2013	2	1	0	0	50	downy birch	1	1
G	48	F14	2013	2	1	0	0	50	downy birch	1	1
G	48	F14	2013	2	1	0	0	50	downy birch	2	2
G	48	F14	2013	2	1	0	0	50	downy birch	1	1
G	48	F14	2013	2	1	0	0	50	downy birch	3	2.5
G	48	F14	2013	2	1	0	0	50	downy birch	1	0.5
G	48	F14	2013	2	1	0	0	50	downy birch	2	2
G	48	F14	2013	2	1	0	0	50	downy birch	2	2
G	48	F14	2013	2	1	0	0	50	downy birch	2	2
G	48	F14	2013	2	2	0	0	5	downy birch	1	1.8
G	48	F14	2013	2	2	0	0	5	downy birch	1	0.5
G	48	F14	2013	2	2	0	0	5	downy birch	1	0.5
G	48	F14	2013	2	2	0	0	5	downy birch	1	1
G	48	F14	2013	2	2	0	0	5	downy birch	1	1
G	48	F14	2013	2	2	0	0	5	downy birch	1	0.5
G	48	F14	2013	2	2	0	0	5	downy birch	1	0.5
G	48	F14	2013	2	2	0	0	5	downy birch	1	1.5
G	48	F14	2013	2	2	0	0	5	downy birch	2	6.5
G	48	F14	2013	2	2	0	0	5	Scots pine	3	11
G	48	F14	2013	2	2	0	0	5	Scots pine	1	0.9
G	48	F14	2013	2	3	0	0	10	downy birch	1	3
G	48	F14	2013	2	3	0	0	10	downy birch	1	1
G	48	F14	2013	2	3	0	0	10	downy birch	1	1.5
G	48	F14	2013	2	3	0	0	10	downy birch	1	2
G	48	F14	2013	2	3	0	0	10	downy birch	1	1
G	48	F14	2013	2	3	0	0	10	downy birch	1	1.5
G	48	F14	2013	2	3	0	0	10	downy birch	1	1
G	48	F14	2013	2	3	0	0	10	downy birch	1	1
G	48	F14	2013	2	3	0	0	10	downy birch	1	1
G	48	F14	2013	2	3	0	0	10	downy birch	1	1
G	48	F14	2013	2	3	0	0	10	downy birch	1	1.4
G	48	F14	2013	2	3	0	0	10	downy birch	1	1.4
G	48	F14	2013	2	3	0	0	10	downy birch	1	1.4
G	48	F14	2013	2	3	0	0	10	downy birch	1	1.4
G	48	F14	2013	2	3	0	0	10	downy birch	1	1.4
G	48	F14	2013	2	3	0	0	10	downy birch	1	1.4
G	48	F14	2013	2	3	0	0	10	downy birch	1	1.4
G	48	F14	2013	2	3	0	0	10	downy birch	1	1.4
G	48	F14	2013	2	3	0	0	10	downy birch	1	1.4
G	48	F14	2013	2	3	0	0	10	downy birch	1	1.4
G	48	F14	2013	2	3	0	0	10	downy birch	1	1.4
G	48	F14	2013	2	3	0	0	10	downy birch	1	1.4
G	48	F14	2013	2	3	0	0	10	downy birch	1	1.4
G	48	F14	2013	2	3	0	0	10	downy birch	1	1.4
G	48	F14	2013	2	3	0	0	10	downy birch	1	1.4
G	48	F14	2013	2	3	0	0	10	downy birch	1	1.4
G	48	F14	2013	2	3	0	0	10	downy birch	1	1.4
G	48	F14	2013	2	3	0	0	10	downy birch	1	1.4
G	48	F14	2013	2	3	0	0	10	downy birch	1	1.4
G	48	F14	2013	2	3	0	0	10	downy birch	1	1.4
G	48	F14	2013	2	3	0	0	10	downy birch	1	1.4
G	48	F14	2013	2	3	0	0	10	downy birch	1	1.4
G	48	F14	2013	2	3	0	0	10	downy birch	1	1.4
G	48	F14	2013	2	3	0	0	10	downy birch	1	1.4
G	48	F14	2013	2	3	0	0	10	downy birch	1	1.4
G	48	F14	2013	2	3	0	0	10	downy birch	1	1.4
G	48	F14	2013	2	3	0	0	10	downy birch	1	1.4
G	48	F14	2013	2	3	0	0	10	downy birch	1	1.4
G	48	F14	2013	2	3	0	0	10	downy birch	1	1.4
G	48	F14	2013	2	3	0	0	10	downy birch	1	1.4
G	48	F14	2013	2	3	0	0	10	downy birch	1	1.4
G	48	F14	2013	2	3	0	0	10	downy birch	1	1.4
G	48	F14	2013	2	3	0	0	10	downy birch	1	1.4
G	48	F14	2013	2	3	0	0	10	downy birch	1	1.4
G	48	F14	2013	2	3	0	0	10	downy birch	1	1.4
G	48	F14	2013	2	3	0	0	10	downy birch	1	1.4
G	48	F14	2013	2	3	0	0	10	downy birch	1	1.4
G	48	F14	2013	2	3	0	0	10	downy birch	1	1.4
G	48	F14	2013	2	3	0	0	10	downy birch	1	1.4
G	48	F14	2013	2	3	0	0	10	downy birch	1	1.4
G	48	F14	2013	2	3	0	0	10	downy birch	1	1.4
G	48	F14	2013	2	3	0	0	10	downy birch	1	1.4
G	48	F14	2013	2	3	0	0	10	downy birch	1	1.4
G	48	F14	2013	2	3	0	0	10	downy birch	1	1.4
G	48	F14	2013	2	3	0	0	10	downy birch	1	1.4
G	48	F14	2013	2	3	0	0	10	Scots pine	4	12.6
G	48	F14	2013	2	3	0	0	10	rowan	2	4.5
G	48	F14	2013	2	4	0	1	8	downy birch	1	2
G	48	F14	2013	2	4	0	1	8	downy birch	1	2
G	48	F14	2013	2	4	0	1	8	downy birch	1	2
G	48	F14	2013	2	4	0	1	8	downy birch	1	2
G	48	F14	2013	2	4	0	1	8	downy birch	1	1.5
G	48	F14	2013	2	4	0	1	8	downy birch	1	3
G	48	F14	2013	2	4	0	1	8	downy birch	1	2
G	48	F14	2013	2	4	0	1	8	downy birch	1	3
G	48	F14	2013	2	4	0	1	8	downy birch	2	2
G	48	F14	2013	2	4	0	1	8	downy birch	1	1.5
G	48	F14	2013	2	4	0	1	8	downy birch	1	2.1
G	48	F14	2013	2	4	0	1	8	downy birch	1	2.1
G	48	F14	2013	2	4	0	1	8	downy birch	1	2.1
G	48	F14	2013	2	4	0	1	8	downy birch	1	2.1
G	48	F14	2013	2	4	0	1	8	downy birch	1	2.1
G	48	F14	2013	2	4	0	1	8	downy birch	1	2.1
G	48	F14	2013	2	4	0	1	8	downy birch	1	2.1
G	48	F14	2013	2	4	0	1	8	downy birch	1	2.1
G	48	F14	2013	2	4	0	1	8	downy birch	1	2.1
G	48	F14	2013	2	4	0	1	8	downy birch	1	2.1
G	48	F14	2013	2	4	0	1	8	downy birch	1	2.1
G	48	F14	2013	2	4	0	1	8	downy birch	1	2.1
G	48	F14	2013	2	4	0	1	8	downy birch	1	2.1
G	48	F14	2013	2	4	0	1	8	downy birch	1	2.1
G	48	F14	2013	2	4	0	1	8	downy birch	1	2.1
G	48	F14	2013	2	4	0	1	8	downy birch	1	2.1
G	48	F14	2013	2	4	0	1	8	downy birch	1	2.1
G	48	F14	2013	2	4	0	1	8	downy birch	1	2.1
G	48	F14	2013	2	4	0	1	8	downy birch	1	2.1
G	48	F14	2013	2	4	0	1	8	downy birch	1	2.1
G	48	F14	2013	2	4	0	1	8	downy birch	1	2.1
G	48	F14	2013	2	4	0	1	8	downy birch	1	2.1
G	48	F14	2013	2	4	0	1	8	downy birch	1	2.1
G	48	F14	2013	2	4	0	1	8	downy birch	1	2.1
G	48	F14	2013	2	4	0	1	8	downy birch	1	2.1
G	48	F14	2013	2	4	0	1	8	downy birch	1	2.1
G	48	F14	2013	2	4	0	1	8	downy birch	1	2.1
G	48	F14	2013	2	4	0	1	8	downy birch	1	2.1
G	48	F14	2013	2	4	0	1	8	downy birch	1	2.1
G	48	F14	2013	2	4	0	1	8	downy birch	1	2.1
G	48	F14	2013	2	4	0	1	8	downy birch	1	2.1
G	48	F14	2013	2	4	0	1	8	downy birch	1	2.1
G	48	F14	2013	2	4	0	1	8	downy birch	1	2.1
G	48	F14	2013	2	4	0	1	8	downy birch	1	2.1
G	48	F14	2013	2	4	0	1	8	downy birch	1	2.1
G	48	F14	2013	2	4	0	1	8	downy birch	1	2.1
G	48	F14	2013	2	4	0	1	8	downy birch	1	2.1
G	48	F14	2013	2	4	0	1	8	downy birch	1	2.1
G	48	F14	2013	2	4	0	1	8	downy birch	1	2.1
G	48	F14	2013	2	4	0	1	8	downy birch	1	2.1
G	48	F14	2013	2	4	0	1	8	downy birch	1	2.1
G	48	F14	2013	2	4	0	1	8	downy birch	1	2.1
G	48	F14	2013	2	4	0	1	8	downy birch	1	2.1
G	48	F14	2013	2	4	0	1	8	downy birch	1	2.1
G	48	F14	2013	2	4	0	1	8	downy birch	1	2.1
G	48	F14	2013	2	4	0	1	8	downy birch	1	2.1
G	48	F14	2013	2	4	0	1	8	downy birch	1	2.1
G	48	F14	2013	2	4	0	1	8	downy birch	1	2.1
G	48	F14	2013	2	4	0	1	8	downy birch	1	2.1
G	48	F14	2013	2	4	0	1	8	downy birch	1	2.1
G	48	F14	2013	2	4	0	1	8	downy birch	1	2.1
G	48	F14	2013	2	4	0	1	8	downy birch	1	2.1
G	48	F14	2013	2	4	0	1	8	downy birch	1	2.1
G	48	F14	2013	2	4	0	1	8	downy birch	1	2.1
G	48	F14	2013	2	4	0	1	8	downy birch	1	2.1
G	48	F14	2013	2	4	0	1	8	downy birch	1	2.1
G	48	F14	2013	2	4	0	1	8	downy birch	1	2.1
G	48	F14	2013	2	4	0	1	8	downy birch	1	2.1
G	48	F14	2013	2	4	0	1	8	downy birch	1	2.1
G	48	F14	2013	2	4	0	1	8	downy birch	1	2.1
G	48	F14	2013	2	4	0	1	8	downy birch	1	2.1
G	48	F14	2013	2	4	0	1	8	downy birch	1	2.1
G	48	F14	2013	2	4	0	1	8	downy birch	1	2.1
G	48	F14	2013	2	4	0	1	8	downy birch	1	2.1
G	48	F14	2013	2	4	0	1	8	downy birch	1	2.1
G	48	F14	2013	2	4	0	1	8	downy birch	1	2.1
G	48	F14	2013	2	4	0	1	8	downy birch	1	2.1
G	48	F14	2013	2	4	0	1	8	downy birch	1	2.1
G	48	F14	2013	2	4	0	1	8	downy birch	1	2.1
G	48	F14	2013	2	4	0	1	8	downy birch	1	2.1
G	48	F14	2013	2	4	0	1	8	downy birch	1	2.1
G	48	F14	2013	2	4	0	1	8	downy birch	1	2.1
G	48	F14	2013	2	4	0	1	8	downy birch	1	2.1
G	48	F14	2013	2	4	0	1	8	downy birch	1	2.1
G	48	F14	2013	2	4	0	1	8	downy birch	1	2.1
G	48	F14	2013	2	4	0	1	8	downy birch	1	2.1
G	48	F14	2013	2	4	0	1	8	downy birch	1	2.1
G	48	F14	2013	2	4	0	1	8	downy birch	1	2.1
G	48	F14	2013	2	4	0	1	8	downy birch	1	2.1
G	48	F14	2013	2	4	0	1	8	downy birch	1	2.1
G	48	F14	2013	2	4	0	1	8	downy birch	1	2.1
G	48	F14	2013	2	4	0	1	8	downy birch	1	2.1
G	48	F14	2013	2	4	0	1	8	downy birch	1	2.1
G	48	F14	2013	2	4	0	1	8	downy birch	1	2.1
G	48	F14	2013	2	4	0	1	8	downy birch	1	2.1
G	48	F14	2013	2	4	0	1	8	downy birch	1	2.1
G	48	F14	2013	2	4	0	1	8	downy birch	1	2.1
G	48	F14	2013	2	4	0	1	8	downy birch	1	2.1
G	48	F14	2013	2	4	0	1	8	downy birch	1	2.1
G	48	F14	2013	2	4	0	1	8	downy birch	1	2.1
G	48	F14	2013	2	4	0	1	8	downy birch	1	2.1
G	48	F14	2013	2	4	0	1	8	downy birch	1	2.1
G	48	F14	2013	2	4	0	1	8	downy birch	1	2.1
G	48	F14	2013	2	4	0	1	8	downy birch	1	2.1
G	48	F14	2013	2	4	0	1	8	downy birch	1	2.1
G	48	F14	2013	2	4	0	1	8	downy birch	1	2.1
G	48	F14	2013	2	4	0	1	8	downy birch	1	2.1
G	48	F14	2013	2	4	0	1	8	downy birch	1	2.1
G	48	F14	2013	2	4	0	1	8	downy birch	1	2.1
G	48	F14	2013	2	4	0	1	8	downy birch	1	2.1
G	48	F14	2013	2	4	0	1	8	downy birch	1	2.1
G	48	F14	2013	2	4	0	1	8	downy birch	1	2.1
G	48	F14	2013	2	4	0	1	8	downy birch	1	2.1
G	48	F14	2013	2	4	0	1	8	downy birch	1	2.1
G	48	F14	2013	2	4	0	1	8	downy birch	1	2.1
G	48	F14	2013	2	4	0	1	8	downy birch	1	2.1
G	48	F14	2013	2	4	0	1	8	downy birch	1	2.1
G	48	F14	2013	2	4	0	1	8	downy birch	1	2.1
G	48	F14	2013	2	4	0	1	8	downy birch	1	2.1
G	48	F14	2013	2	4	0	1	8	downy birch	1	2.1
G	48	F14	2013	2	4	0	1	8	downy birch	1	2.1
G	48	F14	2013	2	4	0	1	8	downy birch	1	2.1
G	48	F14	2013	2	4	0	1	8	downy birch	1	2.1
G	48	F14	2013	2	4	0	1	8	downy birch	1	2.1
G	48	F14	2013	2	4	0	1	8	downy birch	1	2.1
G	48	F14	2013	2	4	0	1	8	downy birch	1	2.1
G	48	F14	2013	2	4	0	1	8	downy birch	1	2.1
G	48	F14	2013	2	4	0	1	8	downy birch	1	2.1
G	48	F14	2013	2	4	0	1	8	downy birch	1	2.1
G	48	F14	2013	2	4	0	1	8	downy birch	1	2.1
G	48	F14	2013	2	4	0	1	8	downy birch	1	2.1
G	48	F14	2013	2	4	0	1	8	downy birch	1	2.1
G	48	F14	2013	2	4	0	1	8	downy birch	1	2.1
G	48	F14	2013	2	4	0	1	8	downy birch	1	2.1
G	48	F14	2013	2	4	0	1	8	downy birch	1	2.1
G	48	F14	2013	2	4	0	1	8	downy birch	1	2.1
G	48	F14	2013	2	4	0	1	8	downy birch	1	2.1
G	48	F14	2013	2	4	0	1	8	downy birch	1	2.1
G	48	F14	2013	2	4	0	1	8	downy birch	1	2.1
G	48	F14	2013	2	4	0	1	8	downy birch	1	2.1
G	48	F14	2013	2	4	0	1	8	downy birch	1	2.1
G	48	F14	2013	2	4	0	1	8	downy birch	1	2.1
G	48	F14	2013	2	4	0	1	8	downy birch	1	2.1
G	48	F14	2013	2	4	0	1	8	downy birch	1	2.1
G	48	F14	2013	2	4	0	1	8	downy birch	1	2.1
G	48	F14	2013	2	4	0	1	8	downy birch	1	2.1
G	48	F14	2013	2	4	0	1	8	downy birch	1	2.1
G	48	F14	2013	2	4	0	1	8	downy birch	1	2.1
G	48	F14	2013	2	4	0	1	8	downy birch	1	2.1
G	48	F14	2013	2	4	0	1	8	downy birch	1	2.1
G	48	F14	2013	2	4	0	1	8	downy birch	1	2.1
G	48	F14	2013	2	4	0	1	8	downy birch	1	2.1
G	48	F14	2013	2	4	0	1	8	downy birch	1	2.1
G	48	F14	2013	2	4	0	1	8	downy birch	1	2.1
G	48	F14	2013	2	4	0	1	8	downy birch	1	2.1
G	48	F14	2013	2	4	0	1	8	downy birch	1	2.1
G	48	F14	2013	2	5	0	0	1	downy birch	3	6.8
G	48	F14	2013	2	5	0	0	1	downy birch	1	0.7
G	48	F14	2013	2	5	0	0	1	downy birch	1	2.6
G	48	F14	2013	2	6	0	0	10	downy birch	3	4.2
G	48	F14	2013	2	6	0	0	10	downy birch	2	1.8
G	48	F14	2013	2	6	0	0	10	downy birch	2	2
G	48	F14	2013	2	6	0	0	10	downy birch	2	1.3
G	48	F14	2013	2	6	0	0	10	downy birch	1	0.5
G	48	F14	2013	2	6	0	0	10	downy birch	2	1.2
G	48	F14	2013	2	6	0	0	10	downy birch	2	1.1
G	48	F14	2013	2	7	0	0	35	downy birch	1	1.2
G	48	F14	2013	2	7	0	0	35	downy birch	1	2
G	48	F14	2013	2	7	0	0	35	downy birch	1	1
G	48	F14	2013	2	7	0	0	35	downy birch	1	1
G	48	F14	2013	2	7	0	0	35	downy birch	1	1
G	48	F14	2013	2	7	0	0	35	downy birch	1	1.5
G	48	F14	2013	2	7	0	0	35	downy birch	1	2
G	48	F14	2013	2	7	0	0	35	downy birch	1	3
G	48	F14	2013	2	7	0	0	35	downy birch	1	2.5
G	48	F14	2013	2	7	0	0	35	downy birch	1	1.8
G	48	F14	2013	2	7	0	0	35	downy birch	1	1.7
G	48	F14	2013	2	7	0	0	35	downy birch	1	1.7
G	48	F14	2013	2	7	0	0	35	downy birch	1	1.7
G	48	F14	2013	2	7	0	0	35	downy birch	1	1.7
G	48	F14	2013	2	7	0	0	35	downy birch	1	1.7
G	48	F14	2013	2	7	0	0	35	downy birch	1	1.7
G	48	F14	2013	2	7	0	0	35	downy birch	1	1.7
G	48	F14	2013	2	7	0	0	35	downy birch	1	1.7
G	48	F14	2013	2	7	0	0	35	downy birch	1	1.7
G	48	F14	2013	2	7	0	0	35	downy birch	1	1.7
G	48	F14	2013	2	7	0	0	35	downy birch	1	1.7
G	48	F14	2013	2	7	0	0	35	downy birch	1	1.7
G	48	F14	2013	2	7	0	0	35	downy birch	1	1.7
G	48	F14	2013	2	7	0	0	35	downy birch	1	1.7
G	48	F14	2013	2	7	0	0	35	downy birch	1	1.7
G	48	F14	2013	2	7	0	0	35	downy birch	1	1.7
G	48	F14	2013	2	7	0	0	35	downy birch	1	1.7
G	48	F14	2013	2	7	0	0	35	downy birch	1	1.7
G	48	F14	2013	2	7	0	0	35	downy birch	1	1.7
G	48	F14	2013	2	7	0	0	35	downy birch	1	1.7
G	48	F14	2013	2	7	0	0	35	downy birch	1	1.7
G	48	F14	2013	2	7	0	0	35	downy birch	1	1.7
G	48	F14	2013	2	7	0	0	35	downy birch	1	1.7
G	48	F14	2013	2	7	0	0	35	downy birch	1	1.7
G	48	F14	2013	2	7	0	0	35	downy birch	1	1.7
G	48	F14	2013	2	7	0	0	35	downy birch	1	1.7
G	48	F14	2013	2	7	0	0	35	downy birch	1	1.7
G	48	F14	2013	2	7	0	0	35	downy birch	1	1.7
G	48	F14	2013	2	7	0	0	35	downy birch	1	1.7
G	48	F14	2013	2	7	0	0	35	downy birch	1	1.7
G	48	F14	2013	2	7	0	0	35	downy birch	1	1.7
G	48	F14	2013	2	7	0	0	35	downy birch	1	1.7
G	48	F14	2013	2	7	0	0	35	downy birch	1	1.7
G	48	F14	2013	2	7	0	0	35	downy birch	1	1.7
G	48	F14	2013	2	7	0	0	35	downy birch	1	1.7
G	48	F14	2013	2	7	0	0	35	downy birch	1	1.7
G	48	F14	2013	2	7	0	0	35	downy birch	1	1.7
G	48	F14	2013	2	7	0	0	35	downy birch	1	1.7
G	48	F14	2013	2	7	0	0	35	downy birch	1	1.7
G	48	F14	2013	2	7	0	0	35	downy birch	1	1.7
G	48	F14	2013	2	7	0	0	35	downy birch	1	1.7
G	48	F14	2013	2	7	0	0	35	downy birch	1	1.7
G	48	F14	2013	2	7	0	0	35	downy birch	1	1.7
G	48	F14	2013	2	7	0	0	35	downy birch	1	1.7
G	48	F14	2013	2	7	0	0	35	downy birch	1	1.7
G	48	F14	2013	2	7	0	0	35	downy birch	1	1.7
G	48	F14	2013	2	7	0	0	35	downy birch	1	1.7
G	48	F14	2013	2	7	0	0	35	downy birch	1	1.7
G	48	F14	2013	2	7	0	0	35	downy birch	1	1.7
G	48	F14	2013	2	7	0	0	35	downy birch	1	1.7
G	48	F14	2013	2	7	0	0	35	downy birch	1	1.7
G	48	F14	2013	2	7	0	0	35	downy birch	1	1.7
G	48	F14	2013	2	7	0	0	35	downy birch	1	1.7
G	48	F14	2013	2	7	0	0	35	downy birch	1	1.7
G	48	F14	2013	2	7	0	0	35	downy birch	1	1.7
G	48	F14	2013	2	7	0	0	35	downy birch	1	1.7
G	48	F14	2013	2	7	0	0	35	downy birch	1	1.7
G	48	F14	2013	2	7	0	0	35	downy birch	1	1.7
G	48	F14	2013	2	7	0	0	35	downy birch	1	1.7
G	48	F14	2013	2	7	0	0	35	downy birch	1	1.7
G	48	F14	2013	2	7	0	0	35	downy birch	1	1.7
G	48	F14	2013	2	7	0	0	35	downy birch	1	1.7
G	48	F14	2013	2	7	0	0	35	downy birch	1	1.7
G	48	F14	2013	2	7	0	0	35	downy birch	1	1.7
G	48	F14	2013	2	7	0	0	35	downy birch	1	1.7
G	48	F14	2013	2	7	0	0	35	downy birch	1	1.7
G	48	F14	2013	2	7	0	0	35	downy birch	1	1.7
G	48	F14	2013	2	7	0	0	35	downy birch	1	1.7
G	48	F14	2013	2	7	0	0	35	downy birch	1	1.7
G	48	F14	2013	2	7	0	0	35	downy birch	1	1.7
G	48	F14	2013	2	7	0	0	35	downy birch	1	1.7
G	48	F14	2013	2	7	0	0	35	downy birch	1	1.7
G	48	F14	2013	2	8	0	0	15	downy birch	1	1.5
G	48	F14	2013	2	8	0	0	15	downy birch	1	1.5
G	48	F14	2013	2	8	0	0	15	downy birch	1	1
G	48	F14	2013	2	8	0	0	15	downy birch	1	1
G	48	F14	2013	2	8	0	0	15	downy birch	1	1
G	48	F14	2013	2	8	0	0	15	downy birch	1	1.4
G	48	F14	2013	2	8	0	0	15	downy birch	1	1
G	48	F14	2013	2	8	0	0	15	downy birch	1	0.6
G	48	F14	2013	2	8	0	0	15	downy birch	1	1
G	48	F14	2013	2	8	0	0	15	downy birch	1	1
G	48	F14	2013	2	8	0	0	15	downy birch	1	1.1
G	48	F14	2013	2	8	0	0	15	downy birch	1	1.1
G	48	F14	2013	2	8	0	0	15	downy birch	1	1.1
G	48	F14	2013	2	8	0	0	15	downy birch	1	1.1
G	48	F14	2013	2	8	0	0	15	downy birch	1	1.1
G	48	F14	2013	2	8	0	0	15	downy birch	1	1.1
G	48	F14	2013	2	8	0	0	15	downy birch	1	1.1
G	48	F14	2013	2	8	0	0	15	downy birch	1	1.1
G	48	F14	2013	2	8	0	0	15	downy birch	1	1.1
G	48	F14	2013	2	8	0	0	15	downy birch	1	1.1
G	48	F14	2013	2	8	0	0	15	downy birch	1	1.1
G	48	F14	2013	2	8	0	0	15	downy birch	1	1.1
G	48	F14	2013	2	8	0	0	15	downy birch	1	1.1
G	48	F14	2013	2	8	0	0	15	downy birch	1	1.1
G	48	F14	2013	2	8	0	0	15	downy birch	1	1.1
G	48	F14	2013	2	8	0	0	15	downy birch	1	1.1
G	48	F14	2013	2	8	0	0	15	downy birch	1	1.1
G	48	F14	2013	2	8	0	0	15	downy birch	1	1.1
G	48	F14	2013	2	8	0	0	15	downy birch	1	1.1
G	48	F14	2013	2	8	0	0	15	downy birch	1	1.1
G	48	F14	2013	2	8	0	0	15	downy birch	1	1.1
G	48	F14	2013	2	8	0	0	15	downy birch	1	1.1
G	48	F14	2013	2	8	0	0	15	downy birch	1	1.1
G	48	F14	2013	2	8	0	0	15	downy birch	1	1.1
G	48	F14	2013	2	8	0	0	15	downy birch	1	1.1
G	48	F14	2013	2	8	0	0	15	downy birch	1	1.1
G	48	F14	2013	2	8	0	0	15	downy birch	1	1.1
G	48	F14	2013	2	8	0	0	15	downy birch	1	1.1
G	48	F14	2013	2	8	0	0	15	downy birch	1	1.1
G	48	F14	2013	2	8	0	0	15	downy birch	1	1.1
G	48	F14	2013	2	8	0	0	15	downy birch	1	1.1
G	48	F14	2013	2	8	0	0	15	downy birch	1	1.1
G	48	F14	2013	2	8	0	0	15	downy birch	1	1.1
G	48	F14	2013	2	8	0	0	15	downy birch	1	1.1
G	48	F14	2013	2	8	0	0	15	downy birch	1	1.1
G	48	F14	2013	2	8	0	0	15	downy birch	1	1.1
G	48	F14	2013	2	8	0	0	15	downy birch	1	1.1
G	48	F14	2013	2	8	0	0	15	downy birch	1	1.1
G	48	F14	2013	2	8	0	0	15	downy birch	1	1.1
G	48	F14	2013	2	8	0	0	15	downy birch	1	1.1
G	48	F14	2013	2	8	0	0	15	downy birch	1	1.1
G	48	F14	2013	2	8	0	0	15	downy birch	1	1.1
G	48	F14	2013	2	8	0	0	15	downy birch	1	1.1
G	48	F14	2013	2	8	0	0	15	downy birch	1	1.1
G	48	F14	2013	2	8	0	0	15	downy birch	1	1.1
G	48	F14	2013	2	8	0	0	15	downy birch	1	1.1
G	48	F14	2013	2	8	0	0	15	downy birch	1	1.1
G	48	F14	2013	2	8	0	0	15	downy birch	1	1.1
G	48	F14	2013	2	8	0	0	15	downy birch	1	1.1
G	48	F14	2013	2	8	0	0	15	downy birch	1	1.1
G	48	F14	2013	2	8	0	0	15	downy birch	1	1.1
G	48	F14	2013	2	8	0	0	15	downy birch	1	1.1
G	48	F14	2013	2	8	0	0	15	downy birch	1	1.1
G	48	F14	2013	2	8	0	0	15	downy birch	1	1.1
G	48	F14	2013	2	8	0	0	15	downy birch	1	1.1
G	48	F14	2013	2	8	0	0	15	downy birch	1	1.1
G	48	F14	2013	2	8	0	0	15	downy birch	1	1.1
G	48	F14	2013	2	8	0	0	15	downy birch	1	1.1
G	48	F14	2013	2	8	0	0	15	downy birch	1	1.1
G	48	F14	2013	2	8	0	0	15	downy birch	1	1.1
G	48	F14	2013	2	8	0	0	15	downy birch	1	1.1
G	48	F14	2013	2	8	0	0	15	downy birch	1	1.1
G	48	F14	2013	2	8	0	0	15	downy birch	1	1.1
G	48	F14	2013	2	8	0	0	15	downy birch	1	1.1
G	48	F14	2013	2	8	0	0	15	downy birch	1	1.1
G	48	F14	2013	2	8	0	0	15	downy birch	1	1.1
G	48	F14	2013	2	8	0	0	15	downy birch	1	1.1
G	48	F14	2013	2	8	0	0	15	downy birch	1	1.1
G	48	F14	2013	2	8	0	0	15	downy birch	1	1.1
G	48	F14	2013	2	8	0	0	15	downy birch	1	1.1
G	48	F14	2013	2	8	0	0	15	downy birch	1	1.1
G	48	F14	2013	2	8	0	0	15	downy birch	1	1.1
G	48	F14	2013	2	8	0	0	15	downy birch	1	1.1
G	48	F14	2013	2	8	0	0	15	downy birch	1	1.1
G	48	F14	2013	2	8	0	0	15	downy birch	1	1.1
G	48	F14	2013	2	8	0	0	15	downy birch	1	1.1
G	48	F14	2013	2	8	0	0	15	downy birch	1	1.1
G	48	F14	2013	2	8	0	0	15	downy birch	1	1.1
G	48	F14	2013	2	8	0	0	15	downy birch	1	1.1
G	48	F14	2013	2	8	0	0	15	downy birch	1	1.1
G	48	F14	2013	2	8	0	0	15	downy birch	1	1.1
G	48	F14	2013	2	8	0	0	15	downy birch	1	1.1
G	48	F14	2013	2	8	0	0	15	downy birch	1	1.1
G	48	F14	2013	2	8	0	0	15	downy birch	1	1.1
G	48	F14	2013	2	8	0	0	15	downy birch	1	1.1
G	48	F14	2013	2	8	0	0	15	downy birch	1	1.1
G	48	F14	2013	2	8	0	0	15	downy birch	1	1.1
G	48	F14	2013	2	8	0	0	15	downy birch	1	1.1
G	48	F14	2013	2	8	0	0	15	downy birch	1	1.1
G	48	F14	2013	2	8	0	0	15	downy birch	1	1.1
G	48	F14	2013	2	8	0	0	15	downy birch	1	1.1
G	48	F14	2013	2	8	0	0	15	downy birch	1	1.1
G	48	F14	2013	2	8	0	0	15	downy birch	1	1.1
G	48	F14	2013	2	8	0	0	15	downy birch	1	1.1
G	48	F14	2013	2	8	0	0	15	downy birch	1	1.1
G	48	F14	2013	2	8	0	0	15	downy birch	1	1.1
G	48	F14	2013	2	8	0	0	15	downy birch	1	1.1
G	48	F14	2013	2	8	0	0	15	downy birch	1	1.1
G	48	F14	2013	2	8	0	0	15	downy birch	1	1.1
G	48	F14	2013	2	8	0	0	15	downy birch	1	1.1
G	48	F14	2013	2	8	0	0	15	downy birch	1	1.1
G	48	F14	2013	2	8	0	0	15	downy birch	1	1.1
G	48	F14	2013	2	8	0	0	15	downy birch	1	1.1
G	48	F14	2013	2	8	0	0	15	downy birch	1	1.1
G	48	F14	2013	2	8	0	0	15	downy birch	1	1.1
G	48	F14	2013	2	8	0	0	15	downy birch	1	1.1
G	48	F14	2013	2	8	0	0	15	downy birch	1	1.1
G	48	F14	2013	2	8	0	0	15	downy birch	1	1.1
G	48	F14	2013	2	8	0	0	15	downy birch	1	1.1
G	48	F14	2013	2	8	0	0	15	downy birch	1	1.1
G	48	F14	2013	2	8	0	0	15	downy birch	1	1.1
G	48	F14	2013	2	8	0	0	15	Scots pine	1	1.6
G	48	F14	2013	2	8	0	0	15	Scots pine	1	2
G	48	F14	2013	2	8	0	0	15	Scots pine	2	1.7
G	48	F14	2013	2	8	0	0	15	Scots pine	1	1.8
G	48	F14	2013	3	1	0	5	30	downy birch	3	11.5
G	48	F14	2013	3	1	0	5	30	downy birch	1	1.5
G	48	F14	2013	3	1	0	5	30	downy birch	1	1.8
G	48	F14	2013	3	1	0	5	30	downy birch	1	1
G	48	F14	2013	3	2	0	0	65	downy birch	1	1.5
G	48	F14	2013	3	3	0	0	4
G	48	F14	2013	3	4	0	0	5
G	48	F14	2013	3	5	0	0	0
G	48	F14	2013	3	6	0	0	6	downy birch	3	5.1
G	48	F14	2013	3	6	0	0	6	Norway spruce	4	3.7
G	48	F14	2013	3	7	0	15	10	downy birch	1	1.2
G	48	F14	2013	3	7	0	15	10	downy birch	1	1.6
G	48	F14	2013	3	7	0	15	10	downy birch	3	13
G	48	F14	2013	3	7	0	15	10	downy birch	2	5.9
G	48	F14	2013	3	7	0	15	10	downy birch	2	20.3
G	48	F14	2013	3	7	0	15	10	downy birch	2	1.8
G	48	F14	2013	3	7	0	15	10	downy birch	2	2.7
G	48	F14	2013	3	7	0	15	10	downy birch	2	13
G	48	F14	2013	3	7	0	15	10	downy birch	3	16
G	48	F14	2013	3	7	0	15	10	downy birch	1	2.7
G	48	F14	2013	3	7	0	15	10	downy birch	2	7.8
G	48	F14	2013	3	7	0	15	10	downy birch	2	7.8
G	48	F14	2013	3	7	0	15	10	downy birch	2	7.8
G	48	F14	2013	3	7	0	15	10	downy birch	2	7.8
G	48	F14	2013	3	7	0	15	10	downy birch	2	7.8
G	48	F14	2013	3	7	0	15	10	downy birch	2	7.8
G	48	F14	2013	3	7	0	15	10	downy birch	2	7.8
G	48	F14	2013	3	7	0	15	10	downy birch	2	7.8
G	48	F14	2013	3	7	0	15	10	downy birch	2	7.8
G	48	F14	2013	3	7	0	15	10	downy birch	2	7.8
G	48	F14	2013	3	7	0	15	10	downy birch	2	7.8
G	48	F14	2013	3	7	0	15	10	downy birch	2	7.8
G	48	F14	2013	3	7	0	15	10	downy birch	2	7.8
G	48	F14	2013	3	7	0	15	10	downy birch	2	7.8
G	48	F14	2013	3	7	0	15	10	downy birch	2	7.8
G	48	F14	2013	3	7	0	15	10	downy birch	2	7.8
G	48	F14	2013	3	7	0	15	10	downy birch	2	7.8
G	48	F14	2013	3	7	0	15	10	downy birch	2	7.8
G	48	F14	2013	3	7	0	15	10	downy birch	2	7.8
G	48	F14	2013	3	7	0	15	10	downy birch	2	7.8
G	48	F14	2013	3	7	0	15	10	downy birch	2	7.8
G	48	F14	2013	3	7	0	15	10	downy birch	2	7.8
G	48	F14	2013	3	7	0	15	10	downy birch	2	7.8
G	48	F14	2013	3	7	0	15	10	downy birch	2	7.8
G	48	F14	2013	3	7	0	15	10	downy birch	2	7.8
G	48	F14	2013	3	7	0	15	10	downy birch	2	7.8
G	48	F14	2013	3	7	0	15	10	downy birch	2	7.8
G	48	F14	2013	3	7	0	15	10	Scots pine	3	2.8
G	48	F14	2013	3	7	0	15	10	Scots pine	3	9.9
G	48	F14	2013	3	8	0	0	20	downy birch	4	38.4
G	48	F14	2013	3	8	0	0	20	downy birch	1	0.7
G	48	F14	2013	3	8	0	0	20	downy birch	1	1.1
G	48	F14	2013	3	8	0	0	20	downy birch	1	0.6
G	48	F14	2013	3	8	0	0	20	downy birch	1	1.6
G	48	F14	2013	3	8	0	0	20	downy birch	1	0.8
G	48	F14	2013	3	8	0	0	20	downy birch	1	1.1
G	48	F14	2013	3	8	0	0	20	downy birch	1	1.2
G	48	F14	2013	3	8	0	0	20	downy birch	1	1.2
G	48	F14	2013	3	8	0	0	20	downy birch	1	1.1
G	48	F14	2013	3	8	0	0	20	downy birch	1	4.8
G	48	F14	2013	3	8	0	0	20	downy birch	1	4.8
G	48	F14	2013	3	8	0	0	20	downy birch	1	4.8
G	48	F14	2013	3	8	0	0	20	downy birch	1	4.8
G	48	F14	2013	3	8	0	0	20	downy birch	1	4.8
G	48	F14	2013	3	8	0	0	20	downy birch	1	4.8
G	48	F14	2013	3	8	0	0	20	downy birch	1	4.8
G	48	F14	2013	3	8	0	0	20	downy birch	1	4.8
G	48	F14	2013	3	8	0	0	20	downy birch	1	4.8
G	48	F14	2013	3	8	0	0	20	downy birch	1	4.8
G	48	F14	2013	3	8	0	0	20	downy birch	1	4.8
G	48	F14	2013	3	8	0	0	20	downy birch	1	4.8
G	48	F14	2013	3	8	0	0	20	downy birch	1	4.8
G	48	F14	2013	3	8	0	0	20	downy birch	1	4.8
G	48	F14	2013	3	8	0	0	20	downy birch	1	4.8
G	48	F14	2013	3	8	0	0	20	downy birch	1	4.8
G	48	F14	2013	4	1	0	0	0
G	48	F14	2013	4	2	0	0	1
G	48	F14	2013	4	3	0	0	4
G	48	F14	2013	4	4	0	0	20	silver birch	2	0.7
G	48	F14	2013	4	5	0	0	8	downy birch	9	10.2
G	48	F14	2013	4	6	0	0	6
G	48	F14	2013	4	7	0	25	0
G	48	F14	2013	4	8	1	50	12	downy birch	1	0.4
G	48	F14	2013	4	8	1	50	12	downy birch	1	0.3
G	48	F14	2013	4	8	1	50	12	downy birch	1	0.3
G	48	F14	2013	4	8	1	50	12	downy birch	1	0.2
G	48	F14	2013	4	8	1	50	12	downy birch	1	0.6
G	48	F14	2013	5	1	4	80	10	downy birch	1	1.4
G	48	F14	2013	5	1	4	80	10	downy birch	1	0.8
G	48	F14	2013	5	1	4	80	10	downy birch	1	0.7
G	48	F14	2013	5	1	4	80	10	downy birch	1	0.6
G	48	F14	2013	5	1	4	80	10	downy birch	1	0.8
G	48	F14	2013	5	1	4	80	10	downy birch	1	1.3
G	48	F14	2013	5	1	4	80	10	downy birch	1	1.4
G	48	F14	2013	5	1	4	80	10	downy birch	1	0.8
G	48	F14	2013	5	1	4	80	10	downy birch	1	0.5
G	48	F14	2013	5	1	4	80	10	downy birch	1	0.6
G	48	F14	2013	5	1	4	80	10	downy birch	1	0.9
G	48	F14	2013	5	1	4	80	10	downy birch	1	0.9
G	48	F14	2013	5	1	4	80	10	downy birch	1	0.9
G	48	F14	2013	5	1	4	80	10	downy birch	1	0.9
G	48	F14	2013	5	1	4	80	10	downy birch	1	0.9
G	48	F14	2013	5	1	4	80	10	downy birch	1	0.9
G	48	F14	2013	5	1	4	80	10	downy birch	1	0.9
G	48	F14	2013	5	1	4	80	10	downy birch	1	0.9
G	48	F14	2013	5	1	4	80	10	downy birch	1	0.9
G	48	F14	2013	5	1	4	80	10	downy birch	1	0.9
G	48	F14	2013	5	1	4	80	10	downy birch	1	0.9
G	48	F14	2013	5	1	4	80	10	downy birch	1	0.9
G	48	F14	2013	5	1	4	80	10	downy birch	1	0.9
G	48	F14	2013	5	1	4	80	10	downy birch	1	0.9
G	48	F14	2013	5	1	4	80	10	downy birch	1	0.9
G	48	F14	2013	5	1	4	80	10	downy birch	1	0.9
G	48	F14	2013	5	1	4	80	10	downy birch	1	0.9
G	48	F14	2013	5	1	4	80	10	downy birch	1	0.9
G	48	F14	2013	5	1	4	80	10	downy birch	1	0.9
G	48	F14	2013	5	1	4	80	10	downy birch	1	0.9
G	48	F14	2013	5	1	4	80	10	downy birch	1	0.9
G	48	F14	2013	5	1	4	80	10	downy birch	1	0.9
G	48	F14	2013	5	1	4	80	10	downy birch	1	0.9
G	48	F14	2013	5	1	4	80	10	downy birch	1	0.9
G	48	F14	2013	5	1	4	80	10	downy birch	1	0.9
G	48	F14	2013	5	1	4	80	10	downy birch	1	0.9
G	48	F14	2013	5	1	4	80	10	downy birch	1	0.9
G	48	F14	2013	5	1	4	80	10	downy birch	1	0.9
G	48	F14	2013	5	1	4	80	10	downy birch	1	0.9
G	48	F14	2013	5	1	4	80	10	downy birch	1	0.9
G	48	F14	2013	5	1	4	80	10	downy birch	1	0.9
G	48	F14	2013	5	1	4	80	10	downy birch	1	0.9
G	48	F14	2013	5	1	4	80	10	downy birch	1	0.9
G	48	F14	2013	5	1	4	80	10	downy birch	1	0.9
G	48	F14	2013	5	1	4	80	10	downy birch	1	0.9
G	48	F14	2013	5	2	40	10	25	downy birch	1	0.8
G	48	F14	2013	5	2	40	10	25	downy birch	1	1.3
G	48	F14	2013	5	2	40	10	25	downy birch	1	0.9
G	48	F14	2013	5	2	40	10	25	downy birch	1	0.7
G	48	F14	2013	5	2	40	10	25	downy birch	1	1
G	48	F14	2013	5	2	40	10	25	downy birch	1	0.9
G	48	F14	2013	5	2	40	10	25	downy birch	1	1.2
G	48	F14	2013	5	2	40	10	25	downy birch	1	1.5
G	48	F14	2013	5	2	40	10	25	downy birch	1	0.9
G	48	F14	2013	5	2	40	10	25	downy birch	1	1
G	48	F14	2013	5	2	40	10	25	downy birch	1	1
G	48	F14	2013	5	2	40	10	25	downy birch	1	1
G	48	F14	2013	5	2	40	10	25	downy birch	1	1
G	48	F14	2013	5	2	40	10	25	downy birch	1	1
G	48	F14	2013	5	2	40	10	25	downy birch	1	1
G	48	F14	2013	5	2	40	10	25	downy birch	1	1
G	48	F14	2013	5	2	40	10	25	downy birch	1	1
G	48	F14	2013	5	2	40	10	25	downy birch	1	1
G	48	F14	2013	5	2	40	10	25	downy birch	1	1
G	48	F14	2013	5	2	40	10	25	downy birch	1	1
G	48	F14	2013	5	2	40	10	25	downy birch	1	1
G	48	F14	2013	5	2	40	10	25	downy birch	1	1
G	48	F14	2013	5	2	40	10	25	downy birch	1	1
G	48	F14	2013	5	2	40	10	25	downy birch	1	1
G	48	F14	2013	5	2	40	10	25	downy birch	1	1
G	48	F14	2013	5	2	40	10	25	downy birch	1	1
G	48	F14	2013	5	2	40	10	25	downy birch	1	1
G	48	F14	2013	5	2	40	10	25	downy birch	1	1
G	48	F14	2013	5	2	40	10	25	downy birch	1	1
G	48	F14	2013	5	2	40	10	25	downy birch	1	1
G	48	F14	2013	5	2	40	10	25	downy birch	1	1
G	48	F14	2013	5	2	40	10	25	downy birch	1	1
G	48	F14	2013	5	2	40	10	25	downy birch	1	1
G	48	F14	2013	5	2	40	10	25	downy birch	1	1
G	48	F14	2013	5	2	40	10	25	downy birch	1	1
G	48	F14	2013	5	2	40	10	25	downy birch	1	1
G	48	F14	2013	5	2	40	10	25	downy birch	1	1
G	48	F14	2013	5	2	40	10	25	downy birch	1	1
G	48	F14	2013	5	2	40	10	25	downy birch	1	1
G	48	F14	2013	5	2	40	10	25	downy birch	1	1
G	48	F14	2013	5	2	40	10	25	downy birch	1	1
G	48	F14	2013	5	2	40	10	25	downy birch	1	1
G	48	F14	2013	5	2	40	10	25	downy birch	1	1
G	48	F14	2013	5	2	40	10	25	downy birch	1	1
G	48	F14	2013	5	2	40	10	25	downy birch	1	1
G	48	F14	2013	5	2	40	10	25	downy birch	1	1
G	48	F14	2013	5	2	40	10	25	downy birch	1	1
G	48	F14	2013	5	2	40	10	25	downy birch	1	1
G	48	F14	2013	5	2	40	10	25	downy birch	1	1
G	48	F14	2013	5	2	40	10	25	downy birch	1	1
G	48	F14	2013	5	2	40	10	25	downy birch	1	1
G	48	F14	2013	5	2	40	10	25	downy birch	1	1
G	48	F14	2013	5	2	40	10	25	downy birch	1	1
G	48	F14	2013	5	2	40	10	25	downy birch	1	1
G	48	F14	2013	5	2	40	10	25	downy birch	1	1
G	48	F14	2013	5	2	40	10	25	downy birch	1	1
G	48	F14	2013	5	2	40	10	25	downy birch	1	1
G	48	F14	2013	5	2	40	10	25	downy birch	1	1
G	48	F14	2013	5	2	40	10	25	downy birch	1	1
G	48	F14	2013	5	2	40	10	25	downy birch	1	1
G	48	F14	2013	5	2	40	10	25	downy birch	1	1
G	48	F14	2013	5	2	40	10	25	downy birch	1	1
G	48	F14	2013	5	2	40	10	25	downy birch	1	1
G	48	F14	2013	5	2	40	10	25	downy birch	1	1
G	48	F14	2013	5	2	40	10	25	downy birch	1	1
G	48	F14	2013	5	2	40	10	25	downy birch	1	1
G	48	F14	2013	5	2	40	10	25	downy birch	1	1
G	48	F14	2013	5	2	40	10	25	downy birch	1	1
G	48	F14	2013	5	2	40	10	25	downy birch	1	1
G	48	F14	2013	5	2	40	10	25	downy birch	1	1
G	48	F14	2013	5	2	40	10	25	downy birch	1	1
G	48	F14	2013	5	2	40	10	25	downy birch	1	1
G	48	F14	2013	5	2	40	10	25	downy birch	1	1
G	48	F14	2013	5	2	40	10	25	downy birch	1	1
G	48	F14	2013	5	2	40	10	25	downy birch	1	1
G	48	F14	2013	5	2	40	10	25	downy birch	1	1
G	48	F14	2013	5	2	40	10	25	downy birch	1	1
G	48	F14	2013	5	2	40	10	25	downy birch	1	1
G	48	F14	2013	5	2	40	10	25	downy birch	1	1
G	48	F14	2013	5	2	40	10	25	downy birch	1	1
G	48	F14	2013	5	2	40	10	25	downy birch	1	1
G	48	F14	2013	5	2	40	10	25	downy birch	1	1
G	48	F14	2013	5	2	40	10	25	downy birch	1	1
G	48	F14	2013	5	2	40	10	25	downy birch	1	1
G	48	F14	2013	5	2	40	10	25	downy birch	1	1
G	48	F14	2013	5	2	40	10	25	downy birch	1	1
G	48	F14	2013	5	2	40	10	25	downy birch	1	1
G	48	F14	2013	5	2	40	10	25	downy birch	1	1
G	48	F14	2013	5	2	40	10	25	downy birch	1	1
G	48	F14	2013	5	2	40	10	25	downy birch	1	1
G	48	F14	2013	5	2	40	10	25	downy birch	1	1
G	48	F14	2013	5	2	40	10	25	downy birch	1	1
G	48	F14	2013	5	2	40	10	25	downy birch	1	1
G	48	F14	2013	5	2	40	10	25	downy birch	1	1
G	48	F14	2013	5	2	40	10	25	downy birch	1	1
G	48	F14	2013	5	2	40	10	25	downy birch	1	1
G	48	F14	2013	5	2	40	10	25	downy birch	1	1
G	48	F14	2013	5	2	40	10	25	downy birch	1	1
G	48	F14	2013	5	2	40	10	25	downy birch	1	1
G	48	F14	2013	5	2	40	10	25	downy birch	1	1
G	48	F14	2013	5	2	40	10	25	downy birch	1	1
G	48	F14	2013	5	2	40	10	25	downy birch	1	1
G	48	F14	2013	5	2	40	10	25	downy birch	1	1
G	48	F14	2013	5	2	40	10	25	downy birch	1	1
G	48	F14	2013	5	2	40	10	25	downy birch	1	1
G	48	F14	2013	5	2	40	10	25	downy birch	1	1
G	48	F14	2013	5	2	40	10	25	downy birch	1	1
G	48	F14	2013	5	2	40	10	25	downy birch	1	1
G	48	F14	2013	5	2	40	10	25	downy birch	1	1
G	48	F14	2013	5	2	40	10	25	downy birch	1	1
G	48	F14	2013	5	2	40	10	25	downy birch	1	1
G	48	F14	2013	5	2	40	10	25	downy birch	1	1
G	48	F14	2013	5	2	40	10	25	downy birch	1	1
G	48	F14	2013	5	2	40	10	25	downy birch	1	1
G	48	F14	2013	5	2	40	10	25	downy birch	1	1
G	48	F14	2013	5	2	40	10	25	Scots pine	1	2.1
G	48	F14	2013	5	3	80	10	6	downy birch	1	0.3
G	48	F14	2013	5	3	80	10	6	downy birch	1	0.4
G	48	F14	2013	5	3	80	10	6	downy birch	1	1
G	48	F14	2013	5	3	80	10	6	downy birch	1	0.8
G	48	F14	2013	5	3	80	10	6	downy birch	1	0.7
G	48	F14	2013	5	3	80	10	6	downy birch	1	0.8
G	48	F14	2013	5	3	80	10	6	downy birch	1	0.4
G	48	F14	2013	5	3	80	10	6	downy birch	1	0.7
G	48	F14	2013	5	3	80	10	6	downy birch	1	0.6
G	48	F14	2013	5	3	80	10	6	downy birch	1	0.3
G	48	F14	2013	5	3	80	10	6	downy birch	1	0.6
G	48	F14	2013	5	3	80	10	6	downy birch	1	0.6
G	48	F14	2013	5	3	80	10	6	downy birch	1	0.6
G	48	F14	2013	5	3	80	10	6	downy birch	1	0.6
G	48	F14	2013	5	3	80	10	6	downy birch	1	0.6
G	48	F14	2013	5	3	80	10	6	downy birch	1	0.6
G	48	F14	2013	5	3	80	10	6	downy birch	1	0.6
G	48	F14	2013	5	3	80	10	6	downy birch	1	0.6
G	48	F14	2013	5	3	80	10	6	downy birch	1	0.6
G	48	F14	2013	5	3	80	10	6	downy birch	1	0.6
G	48	F14	2013	5	3	80	10	6	downy birch	1	0.6
G	48	F14	2013	5	3	80	10	6	downy birch	1	0.6
G	48	F14	2013	5	3	80	10	6	downy birch	1	0.6
G	48	F14	2013	5	3	80	10	6	downy birch	1	0.6
G	48	F14	2013	5	3	80	10	6	downy birch	1	0.6
G	48	F14	2013	5	3	80	10	6	downy birch	1	0.6
G	48	F14	2013	5	3	80	10	6	downy birch	1	0.6
G	48	F14	2013	5	3	80	10	6	downy birch	1	0.6
G	48	F14	2013	5	3	80	10	6	downy birch	1	0.6
G	48	F14	2013	5	3	80	10	6	downy birch	1	0.6
G	48	F14	2013	5	3	80	10	6	downy birch	1	0.6
G	48	F14	2013	5	3	80	10	6	downy birch	1	0.6
G	48	F14	2013	5	3	80	10	6	downy birch	1	0.6
G	48	F14	2013	5	3	80	10	6	downy birch	1	0.6
G	48	F14	2013	5	3	80	10	6	downy birch	1	0.6
G	48	F14	2013	5	3	80	10	6	downy birch	1	0.6
G	48	F14	2013	5	3	80	10	6	downy birch	1	0.6
G	48	F14	2013	5	3	80	10	6	downy birch	1	0.6
G	48	F14	2013	5	3	80	10	6	downy birch	1	0.6
G	48	F14	2013	5	3	80	10	6	downy birch	1	0.6
G	48	F14	2013	5	3	80	10	6	downy birch	1	0.6
G	48	F14	2013	5	3	80	10	6	downy birch	1	0.6
G	48	F14	2013	5	3	80	10	6	downy birch	1	0.6
G	48	F14	2013	5	3	80	10	6	downy birch	1	0.6
G	48	F14	2013	5	3	80	10	6	downy birch	1	0.6
G	48	F14	2013	5	3	80	10	6	downy birch	1	0.6
G	48	F14	2013	5	3	80	10	6	downy birch	1	0.6
G	48	F14	2013	5	3	80	10	6	downy birch	1	0.6
G	48	F14	2013	5	3	80	10	6	downy birch	1	0.6
G	48	F14	2013	5	3	80	10	6	downy birch	1	0.6
G	48	F14	2013	5	3	80	10	6	downy birch	1	0.6
G	48	F14	2013	5	3	80	10	6	downy birch	1	0.6
G	48	F14	2013	5	3	80	10	6	downy birch	1	0.6
G	48	F14	2013	5	3	80	10	6	downy birch	1	0.6
G	48	F14	2013	5	3	80	10	6	downy birch	1	0.6
G	48	F14	2013	5	3	80	10	6	downy birch	1	0.6
G	48	F14	2013	5	3	80	10	6	downy birch	1	0.6
G	48	F14	2013	5	4	6	90	2	downy birch	1	1
G	48	F14	2013	5	4	6	90	2	downy birch	1	0.3
G	48	F14	2013	5	4	6	90	2	downy birch	1	0.1
G	48	F14	2013	5	4	6	90	2	downy birch	1	0.5
G	48	F14	2013	5	4	6	90	2	downy birch	1	0.4
G	48	F14	2013	5	4	6	90	2	downy birch	1	0.6
G	48	F14	2013	5	4	6	90	2	downy birch	1	1.1
G	48	F14	2013	5	4	6	90	2	downy birch	1	1.5
G	48	F14	2013	5	4	6	90	2	downy birch	1	1.3
G	48	F14	2013	5	4	6	90	2	downy birch	5	29.2
G	48	F14	2013	5	4	6	90	2	downy birch	1	3.6
G	48	F14	2013	5	4	6	90	2	downy birch	1	3.6
G	48	F14	2013	5	4	6	90	2	downy birch	1	3.6
G	48	F14	2013	5	4	6	90	2	downy birch	1	3.6
G	48	F14	2013	5	4	6	90	2	downy birch	1	3.6
G	48	F14	2013	5	4	6	90	2	downy birch	1	3.6
G	48	F14	2013	5	4	6	90	2	downy birch	1	3.6
G	48	F14	2013	5	4	6	90	2	downy birch	1	3.6
G	48	F14	2013	5	4	6	90	2	downy birch	1	3.6
G	48	F14	2013	5	4	6	90	2	Scots pine	1	4.8
G	48	F14	2013	5	4	6	90	2	Scots pine	2	3.3
G	48	F14	2013	5	4	6	90	2	Scots pine	1	1.7
G	48	F14	2013	5	5	0	30	3	downy birch	1	0.8
G	48	F14	2013	5	5	0	30	3	downy birch	3	22
G	48	F14	2013	5	5	0	30	3	downy birch	1	0.8
G	48	F14	2013	5	5	0	30	3	downy birch	1	1
G	48	F14	2013	5	5	0	30	3	downy birch	1	0.5
G	48	F14	2013	5	5	0	30	3	downy birch	1	0.9
G	48	F14	2013	5	5	0	30	3	downy birch	1	0.4
G	48	F14	2013	5	5	0	30	3	downy birch	1	1.1
G	48	F14	2013	5	5	0	30	3	downy birch	1	0.5
G	48	F14	2013	5	5	0	30	3	downy birch	1	0.7
G	48	F14	2013	5	5	0	30	3	downy birch	1	2.9
G	48	F14	2013	5	5	0	30	3	downy birch	1	2.9
G	48	F14	2013	5	5	0	30	3	downy birch	1	2.9
G	48	F14	2013	5	5	0	30	3	downy birch	1	2.9
G	48	F14	2013	5	5	0	30	3	downy birch	1	2.9
G	48	F14	2013	5	5	0	30	3	downy birch	1	2.9
G	48	F14	2013	5	6	12	4	15	downy birch	1	1
G	48	F14	2013	5	6	12	4	15	downy birch	1	0.9
G	48	F14	2013	5	6	12	4	15	downy birch	1	1.4
G	48	F14	2013	5	6	12	4	15	downy birch	1	1
G	48	F14	2013	5	6	12	4	15	downy birch	1	0.4
G	48	F14	2013	5	6	12	4	15	downy birch	1	0.5
G	48	F14	2013	5	6	12	4	15	downy birch	1	1.2
G	48	F14	2013	5	6	12	4	15	downy birch	1	0.6
G	48	F14	2013	5	6	12	4	15	downy birch	1	0.7
G	48	F14	2013	5	6	12	4	15	downy birch	1	1.2
G	48	F14	2013	5	6	12	4	15	downy birch	1	1.1
G	48	F14	2013	5	7	0	0	3	downy birch	1	1
G	48	F14	2013	5	7	0	0	3	downy birch	1	0.6
G	48	F14	2013	5	7	0	0	3	downy birch	1	1.5
G	48	F14	2013	5	7	0	0	3	downy birch	1	1.5
G	48	F14	2013	5	7	0	0	3	downy birch	1	1
G	48	F14	2013	5	7	0	0	3	downy birch	1	1.1
G	48	F14	2013	5	7	0	0	3	downy birch	1	1.1
G	48	F14	2013	5	7	0	0	3	downy birch	1	0.7
G	48	F14	2013	5	7	0	0	3	downy birch	1	1.6
G	48	F14	2013	5	7	0	0	3	downy birch	1	1.1
G	48	F14	2013	5	8	0	0	15	downy birch	3	4.9
G	158	F11	2012	10	1	0	5	7	downy birch	1	2.2
G	158	F11	2012	10	1	0	5	7	downy birch	1	3.1
G	158	F11	2012	10	1	0	5	7	downy birch	1	2.6
G	158	F11	2012	10	2	0	70	7	downy birch	2	10.7
G	158	F11	2012	10	2	0	70	7	downy birch	2	7.4
G	158	F11	2012	10	2	0	70	7	downy birch	2	15.3
G	158	F11	2012	10	2	0	70	7	downy birch	1	1.4
G	158	F11	2012	10	3	0	15	20	silver birch	4	18.5
G	158	F11	2012	10	3	0	15	20	silver birch	4	30.5
G	158	F11	2012	10	3	0	15	20	downy birch	3	25
G	158	F11	2012	10	3	0	15	20	downy birch	1	1.8
G	158	F11	2012	10	3	0	15	20	downy birch	1	2.3
G	158	F11	2012	10	3	0	15	20	downy birch	1	2.1
G	158	F11	2012	10	3	0	15	20	downy birch	1	3.5
G	158	F11	2012	10	3	0	15	20	downy birch	1	1.6
G	158	F11	2012	10	3	0	15	20	downy birch	1	2.2
G	158	F11	2012	10	3	0	15	20	downy birch	1	1.2
G	158	F11	2012	10	3	0	15	20	downy birch	1	0.8
G	158	F11	2012	10	3	0	15	20	downy birch	1	1
G	158	F11	2012	10	3	0	15	20	downy birch	1	4.2
G	158	F11	2012	10	3	0	15	20	downy birch	1	4.2
[truncated: 16,082 more rows]
